# Supplementary material for: Importance of food-demand management for climate mitigation
Source: Springer Nature journal article supplement (doi:10.1038/nclimate2353), 2014-08-29
Supplement: 41558_2014_BFnclimate2353_MOESM454_ESM.xlsx [file 41558_2014_BFnclimate2353_MOESM454_ESM.xlsx]

## Sheet: Cover
The importance of food demand management for climate mitigation
Bojana BAJŽELJ*, Keith S. RICHARDS, Julian M. ALLWOOD, Pete SMITH, John S. DENNIS, Elizabeth CURMI and Christopher A. GILLIGAN
Supplementary data 1
The parameters for the regional agricultural biomass flows maps (for the 2009 base year).
The parameterisation of the agricultural biomass flows is an important part of the study. These spreadsheets list all the input parameters per region, collected from many sources of empirical data. They also show the main calculations and resulting outputs.
Note: This data is best printed in a landscape A4 format, choosing: Print > Entire Workbook
Carbon content of biomass
Crops		DM	Carbon content
			Harvest	Residue
		mass ratio
Source			Gourdiaan et al. (2001) [1]
Wheat		0.85	0.47	0.48
Rice		0.88	0.48	0.42
Barley		0.85	0.47	0.48
Maize		0.84	0.49	0.48
Rye		0.85	0.47	0.48
Oats		0.85	0.47	0.48
Millet		0.88	0.48	0.48
Sorghum		0.88	0.48	0.48
Cereals, Other		0.9	0.47	0.48
Starchy Roots		0.25	0.44	0.48
Sugar Cane		0.27	0.48	0.48
Sugar Beet		0.21	0.44	0.48
Pulses		0.9	0.47	0.48
Treenuts		0.95	0.6	0.5
Oilcrops		0.92	0.52	0.48
Soyabeans		0.87	0.52	0.48
Vegetables		0.13	0.46	0.47
Fruits		0.19	0.45	0.5
Cotton		0.85	0.54	0.5
Forage crops		0.249956	0.48	0.48
Pasture grasses		0.249956	0.48	0.48

## Sheet: CAsia
			Central Asia			Biomass flows									Confidence colour coding:				Good > Lower > Lowest
Crops	Plant growth uses					Harvest uses							Residue uses					Processing outcomes				Food
	Harvest	Residue (above)	Residue (below)	Other plants	Losses	Food	Seeds	Processing	Feed	Loss	Other	Biofuel	Feed	Fibre	Energy	Soil	Waste (burn)	Food	Feed	Energy	Loss	Waste
Notation	ph	pr	pbr	po	ploss	hd	hs	hp	hl	hloss	ho	hb	rl	rfib	ren	rs	rw	pf	pl	pe	pw	fw
Source	[2], [3]	[1]		ass.	[4]	[5]	[5]	[5]	[5]	[5], [6]	[5]	[7]	[8]	[9]	[9]	remainder	[10]	[5], [8]	[5], [8]	assumed	[5], [6]	[6]
Wheat	0.274031	0.389965	0.15	0.05	0.136003	0.0545073	0.138556	0.338131	0.328806	0.14	0	0	0.72	0.01	0.03	0.0938	0.1462	0.73	0.1377	0	0.1323	0.16
Rice	0.165224	0.381627	0.15	0.05	0.253149	0.807479	0.0504202	0	0.00210084	0.14	0	0	0.72	0.01	0.03	0.0887	0.1513	0.69	0.124	0	0.186	0.16
Barley	0.277947	0.400608	0.15	0.05	0.121445	0.00781119	0.110221	0.0714871	0.670481	0.14	0	0	0.72	0.01	0.03	0.1006	0.1394	0.5	0.45	0	0.05	0.16
Maize	0.313953	0.321805	0.15	0.05	0.164242	0.0286003	0.0226629	0.169218	0.639518	0.14	0	0	0.72	0.01	0.03	0.0836	0.1564	0.69	0.155	0.062	0.093	0.16
Rye	0.28238	0.357481	0.15	0.05	0.16014	0	0	0	0	0.14	0	0	0.72	0.01	0.03	0.1006	0.1394	0.69	0.1302	0	0.1798	0.16
Oats	0.271713	0.369533	0.15	0.05	0.158754	0.00619048	0.1	0.00619048	0.747619	0.14	0	0	0.72	0.01	0.03	0.1006	0.1394	0.69	0.1302	0	0.1798	0.16
Millet	0.249939	0.394137	0.15	0.05	0.155924	0.03	0.05	0.03	0.75	0.14	0	0	0.72	0.01	0.03	0.1006	0.1394	0.69	0.1302	0	0.1798	0.16
Sorghum	0.319079	0.316012	0.15	0.05	0.164909	0	0	0	0.86	0.14	0	0	0.72	0.01	0.03	0.1006	0.1394	0.69	0.1302	0	0.1798	0.16
Cereals, Other	0.278079	0.36234	0.15	0.05	0.159581	0.0674541	0.0163934	0.399103	0.377049	0.14	0	0	0.72	0.01	0.03	0.1006	0.1394	0.69	0.1302	0	0.1798	0.16
Starchy Roots	0.282609	0.282609	0.15	0.05	0.234783	0.508374	0.116104	0.00442425	0.211098	0.16	0	0	0.56	0.01	0.03	0.2606	0.1394	0.69	0	0	0.31	0.1
Sugar Cane	0.343085	0.228723	0.15	0.05	0.228191	0	0	0	0	0	0	0	0.72	0.01	0.03	0.1244	0.1156	0.47619	0	0.471429	0.052381	0.04
Sugar Beet	0.343085	0.228723	0.15	0.05	0.228191	0	0	0.956274	0.0361217	0.00760456	0	0	0.135	0	0	0.7256	0.1394	0.47619	0.471429	0	0.052381	0.04
Pulses	0.290541	0.290541	0.15	0.05	0.218919	0.0123549	0.0681818	0.0730997	0.636364	0.21	0	0	0.56	0	0	0.3006	0.1394	0.9	0	0	0.1	0.04
Treenuts	0.172	0.43	0.15	0.05	0.198	0.79	0	0	0	0.21	0	0	0.56	0	0	0.3006	0.1394	0.9	0.049	0	0.051	0.04
Oilcrops	0.182828	0.417261	0.15	0.05	0.199911	0.0100962	0.0525862	0.669375	0.1291	0.159167	0	0	0.56	0	0	0.3006	0.1394	0.24059	0.683469	0	0.075941	0.04
Soyabeans	0.30091	0.367779	0.15	0.05	0.131311	0	0.047619	0.694762	0.047619	0.21	0	0	0.72	0	0	0.1644	0.1156	0.205255	0.794745	0	0	0.04
Vegetables	0.443299	0.110825	0.15	0.05	0.245876	0.0888598	0.00153645	0.529133	0.110471	0.27	0	0	0.56	0	0	0.3006	0.1394	0.9	0	0	0.1	0.27
Fruits	0.172	0.43	0.15	0.05	0.198	0.533345	0	0.157185	0.03947	0.27	0	0	0	0	0	0.8606	0.1394	0.9	0	0	0.1	0.27
Cotton	0.195351	0.455818	0.15	0.05	0.148831	0	0.138556	0	0	0.14	0.721444	0	0	0	0	0.8606	0.1394	0.9	0	0	0.1	0
Forage crops	0.392584	0	0.4	0.207416	0	0	0	0	1	0	0	0	na	na	na	na	na	na	na	na	na	na
Other	0.274031	0.389965	0.15	0.05	0.136003	0.0545073	0.138556	0.338131	0.328806	0.14	0	0	0.72	0.01	0.03	0.0938	0.1462	0.73	0.1377	0	0.1323	0.16
	Statistical data inputs				Calculated growth distribution in Carbon							Final outcomes
	Production	Av. Yields	Net trade - Exports		Real NPP	Harvest	Residue (above ground)	Residue (below ground)	Other plants	Losses and weeds		Food	Fodder	Feed	Losses	Soil	Fibre	Energy	Seed	Other ecosys. service	TOTAL
Source	[5]	[11]	[5]		calculated							calculated
Unit	TgC	t/ha	TgC		Tg C							Tg C
Wheat	28.585	1.6541	2.33148		41.673	11.4197	16.251	6.25095	2.08365	5.66767		2.30049	12.1239	2.98826	10.1607	7.7753	0.16251	0.487531	1.25922	2.08365	41.673
Rice	0.464	3.4996	-0.0050688		1.18623	0.195994	0.452697	0.177934	0.0593115	0.300293		0.136377	0.325942	0.0004224	0.422911	0.218089	0.00452697	0.0135809	0.0101376	0.0593115	1.18623
Barley	3.183	1.573	0.22412		4.57501	1.27161	1.83278	0.686251	0.22875	0.555613		0.0383234	1.3533	0.702321	0.968795	0.870629	0.0183278	0.0549835	0.115455	0.22875	4.57501
Maize	1.347	5.6306	-0.026754		1.76595	0.554425	0.568292	0.264893	0.0882976	0.290044		0.0709639	0.424414	0.371675	0.482953	0.312402	0.00568292	0.0231462	0.0131712	0.0882976	1.76595
Rye	0.089	1.4841	0.006392		0.125914	0.0355555	0.0450118	0.0188871	0.00629569	0.0201638		0	0.0324085	0	0.0305213	0.0234153	0.000450118	0.00135035	0	0.00629569	0.100833
Oats	0.211	1.376	0.0003995		0.310234	0.0842945	0.114642	0.0465351	0.0155117	0.0492507		0.000737269	0.0826097	0.0627215	0.0772109	0.058068	0.00114642	0.00343925	0.0083895	0.0155117	0.310234
Millet	0.04	1.0825	0		0.0676005	0.016896	0.0266438	0.0101401	0.00338002	0.0105406		0.000719567	0.0192496	0.012672	0.0168483	0.0128204	0.000266438	0.000799315	0.0008448	0.00338002	0.0676005
Sorghum	0.02	5.4496	0		0.0264762	0.008448	0.0083668	0.00397143	0.00132381	0.00436615		0	0.00602409	0.00726528	0.0067152	0.00481313	8.3668e-05	0.000251004	0	0.00132381	0.0264762
Cereals, Other	0.148	2.3027	-0.014805		0.22513	0.062604	0.0815737	0.0337695	0.0112565	0.0359265		0.0222924	0.0627555	0.029187	0.0679361	0.0419759	0.000815737	0.00244721	0.001269	0.0112565	0.22513
Starchy Roots	6.611	16.9064	-0.00231		2.5732	0.72721	0.72721	0.385981	0.12866	0.604144		0.335787	0.407238	0.154	0.86055	0.575492	0.0072721	0.0218163	0.0847	0.12866	2.5732
Sugar Cane	0	0	0		0	0	0	0	0	0		0	0	0	0	0	0	0	0	0	0
Sugar Beet	0.469	13.1555	-0.685815		0.126312	0.0433356	0.0288904	0.0189467	0.00631558	0.0288232		0.318751	0.332612	0.0263381	0.0882002	0.0399096	0	0	0	0.00631558	0.126312
Pulses	0.232	1.5417	0.023688		0.33777	0.098136	0.098136	0.0506656	0.0168885	0.0739443		0.005585	0.0549562	0.047376	0.104035	0.0801652	0	0	0.005076	0.0168885	0.33777
Treenuts	0.056	1.7906	-0.00855		0.185581	0.03192	0.0798	0.0278372	0.00927907	0.0367451		0.0306924	0.044688	0	0.0576468	0.0518251	0	0	0	0.00927907	0.185581
Oilcrops	3.44	0.5949	-0.17724		9.00131	1.6457	3.75589	1.3502	0.450066	1.79946		0.2995	2.1033	1.06933	2.71833	2.47922	0	0	0.0958613	0.450066	9.03836
Soyabeans	0.094	1.7966	0.00872876		0.141323	0.0425256	0.0519757	0.0211985	0.00706616	0.0185573		0.00462675	0.0560838	0.00160937	0.0318558	0.0297433	0	0	0.00160937	0.00706616	0.141323
Vegetables	13.422	25.9819	0.024219		1.8106	0.802636	0.200659	0.271589	0.0905298	0.445183		0.321103	0.112369	0.0859924	0.84328	0.331908	0	0	0.001196	0.0905298	1.8106
Fruits	3.632	7.0219	0.0072675		1.80544	0.310536	0.77634	0.270816	0.0902721	0.357477		0.149394	0	0.01197	0.607604	0.938934	0	0	0	0.0902721	1.80544
Cotton	1.57384	0.6997	0		3.69793	0.722393	1.68558	0.55469	0.184897	0.550366		0	0	0	0.886472	2.0053	0.521167	0	0.100092	0.184897	3.69793
Forage crops	107.435	28.0049	0		32.8337	12.89	0	13.1335	6.81024	0		0	12.89	0	0	13.1335			0	6.81024	32.8337
Other	0	0	0		0	0	0	0	0	0		0	0	0	0	0	0		0	0	0
TOTAL	63.6168		1.70575		102.469	18.0739	26.7855	10.4453	3.48175	10.8486		4.03534	30.4318	5.57114	18.4325	28.9835	0.722249	0.609345	1.69703	10.292	102.481
			Central Asia			Livestock system inputs and outputs
Livestock feed				NPP sinks						Livestock system outcomes			Manure uses			Final outcomes
	total available in DM	total used in DM	Undergrou. NPP ratio	Total NPP	NPP remaining on land	NPP used	Relative digestability			Food	Manure	Respiration	Fuel, material	Soil	Waste	Total meat	Losses of meat	Total soil	Fuel, material	Respiration	Other ecosystem serv.	Manure losses	TOTAL
Source	[8]	[8]	ass.	calculated			[8]			calculated			ass.	[12]	[12]	calculated
Unit	Tg	Pg		Pg C												Pg C
Grazing	553.566	257.135	0.5	531.423	407.998	123.425	0.289863			0.00694712	0.124052	0.868654	0	1	0	0.714141	0.143308	15.3111	0	107.214	407.998	0	531.381
Forage	see crops table					12.89	0.368362			0.0088285	0.267004	0.723727	0.01	0.315909	0.664091	0.0947795	0.0190195	1.08725	0.0344167	9.32881	0	2.28559	12.8499
Feed						5.57114	1			0.0239669	0.251866	0.722971	0.01	0.315909	0.664091	0.111207	0.0223161	0.443276	0.0140318	4.02778	0	0.93184	5.55045
Residuals						17.5418	0.289863			0.0088285	0.267004	0.723727	0.01	0.315909	0.664091	0.128985	0.0258835	1.47963	0.0468374	12.6955	0	3.11044	17.4873
TOTAL						159.428										1.04911	0.210527	18.3213	0.095286	133.266	407.998	6.32786	567.268
Livestock products										Food demand incr. to 2050	Demand under Meat reduction scenario
	Livestock production	Livestock production in C	Agricultural wastage	Food wastage	Net trade - exports	Total meat
Source	[11]	calculated	[6]	[6]	[11]					[13]	[14]
Unit	Pg	Pg C			Pg	Pg				%	PgC
Pig meat	0.249446	0.0473572	0.118	0.13	-0.0120562	0.0446789				2.27133	0.0816166
Beef and Buffalo Meat + (Total)	1.27932	0.242878	0.118	0.13	-0.00251171	0.184533				2.27133	0.0900415
Eggs Primary + (Total)	0.419433	0.0935327	0.118	0.13	-0.00511379	0.0741822				2.27133	0.263542
Milk,Total + (Total)	10.184	0.759591	0.095	0.1	-0.0322655	0.637445				1.78792	1.10974
Poultry Meat + (Total)	0.132409	0.0251378	0.118	0.13	-0.0271265	0.0393027				2.27133	0.165077
Sheep and Goat Meat + (Total)	0.451933	0.0857993	0.118	0.13	0	0.0645211				2.27133	0.149538
TOTAL	12.7165	1.2543			-0.0790737	1.04466					1.85956
References
[1]	Scarlat et al. (2010)
[2]	Haberl et al. (2007)
[3]	Wirsenius (2000)
[4]	Oerke and Dehne (1997)
[5]	Faostat (2013) Food Balance Sheets
[6]	Gustavsson (2012)
[7]	Biofuels platform (2012)
[8]	Wirsenius (2000)
[9]	after Smil (1999)
[10]	Streets et al. 2003
[11]	Faostat (2013) production
[12]	Conant et al. 2013
[13]	Alexandratos & Bruinsma (2012)
[14]	Willet (2001)
[15]	Gourdiaan et al. (2001)

## Sheet: EAsia
			East Asia			Biomass flows									Confidence colour coding:				Good > Lower > Lowest
Crops	Plant growth uses					Harvest uses							Residue uses					Processing outcomes				Food
	Harvest	Residue (ag)	Residue (bg)	Other plants	Losses	Food	Seeds	Processing	Feed	Loss	Other	Biofuel	Feed	Fibre	Energy	Soil	Waste (burn)	Food	Feed	Energy	Loss	Waste
Notation	ph	pr	pbr	po	ploss	hd	hs	hp	hl	hloss	ho	hb	rl	rfib	ren	rs	rw	pf	pl	pe	pw	fw
Source	[1], [2]	[1]		ass.	[4]	[5]	[5]	[5]	[5]	[5], [6]	[5]	[7]	[8]	[9]	[9]	remainder	[10]	[5], [8]	[5], [8]	assumed	[5], [6]	[6]
Wheat	0.334434	0.349518	0.15	0.02	0.146048	0.109968	0.0340404	0.652469	0.0835234	0.12	0	0	0.24	0.01	0.03	0.5738	0.1462	0.73	0.1377	0	0.1323	0.22
Rice	0.218715	0.339184	0.15	0.02	0.272101	0.745691	0.0337518	0.00262284	0.0979345	0.12	0	0	0.24	0.01	0.03	0.5687	0.1513	0.69	0.124	0	0.186	0.22
Barley	0.326529	0.374254	0.15	0.02	0.129217	0.0097882	0.013664	0.62814	0.228408	0.12	0	0	0.24	0.01	0.03	0.5806	0.1394	0.5	0.45	0	0.05	0.22
Maize	0.329068	0.330828	0.15	0.02	0.170105	0.0164097	0.00744035	0.168701	0.687449	0.12	0	0	0.27	0.01	0.03	0.5336	0.1564	0.69	0.155	0.062	0.093	0.22
Rye	0.300287	0.363348	0.15	0.02	0.166365	0.553001	0.000129153	0	0.32687	0.12	0	0	0.24	0.01	0.03	0.5806	0.1394	0.69	0.1302	0	0.1798	0.22
Oats	0.297998	0.365935	0.15	0.02	0.166068	0.0843884	0.0277427	0.0843884	0.68348	0.12	0	0	0.24	0.01	0.03	0.5806	0.1394	0.69	0.1302	0	0.1798	0.22
Millet	0.274137	0.392896	0.15	0.02	0.162967	0.130222	0.0213904	0.130222	0.598167	0.12	0	0	0.24	0.01	0.03	0.5806	0.1394	0.69	0.1302	0	0.1798	0.22
Sorghum	0.299724	0.363984	0.15	0.02	0.166292	0.0229558	0.00599829	0.135822	0.715224	0.12	0	0	0.24	0.01	0.03	0.5806	0.1394	0.69	0.1302	0	0.1798	0.22
Cereals, Other	0.309216	0.353259	0.15	0.02	0.167525	0.0570576	0.112305	0.337591	0.373047	0.12	0	0	0.24	0.01	0.03	0.5806	0.1394	0.69	0.1302	0	0.1798	0.22
Starchy Roots	0.293696	0.293696	0.15	0.02	0.242609	0.328219	0.0164831	0.0365582	0.34874	0.27	0	0	0.28	0.01	0.03	0.5406	0.1394	0.69	0	0	0.31	0.19
Sugar Cane	0.356489	0.23766	0.15	0.02	0.235851	0.000491797	0	0.980143	0.0193657	0	0	0	0.36	0.01	0.03	0.4844	0.1156	0.409412	0	0.531529	0.0590588	0.046
Sugar Beet	0.356489	0.23766	0.15	0.02	0.235851	0	0	0	0	0	0	0	0.135	0	0	0.7256	0.1394	0.409412	0.531529	0	0.0590588	0.046
Pulses	0.301892	0.301892	0.15	0.02	0.226216	0.0694865	0.0667426	0.411129	0.362642	0.09	0	0	0.175	0	0	0.6856	0.1394	0.9	0	0	0.1	0.046
Treenuts	0.17872	0.4468	0.15	0.02	0.20448	0.91	0	0	0	0.09	0	0	0.28	0	0	0.5806	0.1394	0.9	0.049	0	0.051	0.046
Oilcrops	0.301892	0.301892	0.15	0.02	0.226216	0.0966792	0.018301	0.789733	0.0544192	0.0396582	0	0	0.175	0	0	0.6856	0.1394	0.362546	0.573708	0	0.0637454	0.046
Soyabeans	0.312448	0.381881	0.15	0.02	0.135671	0.101986	0.019477	0.755271	0.0332662	0.09	0	0	0.2	0	0	0.6844	0.1156	0.206111	0.793889	0	0	0.046
Vegetables	0.460619	0.115155	0.15	0.02	0.254227	0.11068	0	0.654857	0.0544635	0.18	0	0	0.175	0	0	0.6856	0.1394	0.9	0	0	0.1	0.23
Fruits	0.17872	0.4468	0.15	0.02	0.20448	0.617392	0	0.202608	0	0.18	0	0	0	0	0	0.8606	0.1394	0.9	0	0	0.1	0.23
Cotton	0.202887	0.473404	0.15	0.02	0.153709	0	0.0340404	0	0	0.12	0.84596	0	0	0	0	0.8606	0.1394	0.9	0	0	0.1	0
Forage crops	0.467463	0	0.4	0.132537	0	0	0	0	1	0	0	0	na	na	na	na	na	na	na	na	na	na
Other Crops	0.334434	0.349518	0.15	0.02	0.146048	0.109968	0.0340404	0.652469	0.0835234	0.12	0	0	0.24	0.01	0.03	0.5738	0.1462	0.73	0.1377	0	0.1323	0.22
	Statistical data inputs				Calculated growth distribution in Carbon							Final outcomes
	Production	Av. Yields	Net trade - Exports		Real NPP	Harvest	Residue (above ground)	Residue (below ground)	Other plants	Losses and weeds		Food	Fodder	Feed	Losses	Soil	Fibre	Energy	Seed	Other ecosys. service	TOTAL
Source	[5]	[11]	[5]		calculated							calculated
Unit	TgC	t/ha	TgC		TgC							TgC
Wheat	116.365	4.6869	-2.89757		139.004	46.4878	48.5845	20.8507	2.78009	20.3014		22.5835	16.0973	4.12484	43.9634	48.7285	0.485845	1.45754	1.6811	2.78009	139.004
Rice	144.492	6.5006	-0.277094		279.055	61.0334	94.651	41.8582	5.5811	75.9311		35.7471	22.7362	6.00442	107.721	95.6862	0.94651	2.83953	2.06934	5.5811	279.055
Barley	2.711	3.5477	-1.28519		3.31684	1.08304	1.24134	0.497526	0.0663369	0.428593		0.598239	0.967335	0.540923	1.12894	1.21825	0.0124134	0.0372403	0.0323595	0.0663369	3.31684
Maize	165.89	5.2295	-5.01864		207.496	68.2803	68.6455	31.1245	4.14993	35.2961		7.59336	20.451	50.3893	58.1199	67.7537	0.686455	2.82603	0.54537	4.14993	207.496
Rye	0.699	2.9754	-0.033558		0.929945	0.27925	0.337894	0.139492	0.0185989	0.15471		0.134927	0.0810945	0.102248	0.277406	0.335673	0.00337894	0.0101368	4.04002e-05	0.0185989	0.929945
Oats	0.599	2.8316	-0.077503		0.803028	0.2393	0.293856	0.120454	0.0160606	0.133357		0.0352415	0.0740062	0.216529	0.227084	0.291067	0.00293856	0.00881568	0.008789	0.0160606	0.803028
Millet	1.289	1.6085	-0.008448		1.98614	0.544474	0.780347	0.297921	0.0397228	0.323675		0.0949134	0.196658	0.330739	0.538522	0.75099	0.00780347	0.0234104	0.0118272	0.0397228	1.98614
Sorghum	1.71	2.9396	-0.756518		2.40989	0.722304	0.877162	0.361484	0.0481979	0.400746		0.13458	0.23667	1.05769	0.774553	0.870764	0.00877162	0.0263149	0.0088704	0.0481979	2.40989
Cereals, Other	0.968	3.58433	-0.023688		1.3242	0.409464	0.467785	0.19863	0.026484	0.221837		0.0979774	0.131307	0.161586	0.392951	0.470226	0.00467785	0.0140335	0.048645	0.026484	1.3242
Starchy Roots	163.21	17.3989	-3.02841		61.1282	17.9531	17.9531	9.16924	1.22256	14.8302		6.00679	5.02687	7.31709	24.6447	18.8747	0.179531	0.538593	0.34584	1.22256	61.1282
Sugar Cane	117.766	68.0501	-1.21982		42.8133	15.2625	10.175	6.42199	0.856265	10.0976		6.31754	3.66299	0.319191	12.5325	11.3508	0.10175	8.8921	0	0.856265	42.8133
Sugar Beet	10.828	43.1599	9.24e-05		2.80656	1.00051	0.667005	0.420983	0.0561311	0.661929		0	0.0900456	0	0.75491	0.904962	0	0	0	0.0561311	1.80614
Pulses	4.753	1.4874	0.153549		6.65973	2.01052	2.01052	0.99896	0.133195	1.50654		0.7786	0.351841	0.673416	2.06782	2.37737	0	0	0.123939	0.133195	6.65973
Treenuts	3.08	3.9181	-0.22572		9.82319	1.7556	4.389	1.47348	0.196464	2.00865		1.72006	1.22892	0	2.88173	4.02173	0	0	0	0.196464	9.82319
Oilcrops	42.93	1.8762	-8.42265		68.03	20.5377	20.5377	10.2045	1.3606	15.3895		10.5814	3.5941	14.6973	21.3691	24.2852	0	0	0.530005	1.3606	67.995
Soyabeans	15.7	1.6176	-23.642		22.7324	7.10268	8.68105	3.40985	0.454647	3.08413		7.55715	20.1707	1.02276	7.21907	9.35117	0	0	0.598814	0.454647	22.7324
Vegetables	549.801	23.0996	0.363524		71.3781	32.8781	8.21952	10.7067	1.42756	18.1462		17.5266	1.43842	1.77086	32.5091	16.342	0	0	0	1.42756	71.3781
Fruits	123.888	10.6076	-0.250087		59.2683	10.5924	26.4811	8.89024	1.18537	12.1192		6.67681	0	0	19.9763	31.6798	0	0	0	1.18537	59.2683
Cotton	6.82952	1.3235	0		15.4507	3.13475	7.31442	2.3176	0.309014	2.3749		0	0	0	3.7707	8.61239	2.65187	0	0.106708	0.309014	15.4507
Forage crops	237.251	40.9031	0		60.8929	28.4652	0	24.3571	8.07053	0		0	28.4652	0	0	24.3571			0	8.07053	60.8929
Other	0	0	0		0	0	0	0	0	0		0	0	0	0	0	0	0	0	0	0
TOTAL	1473.51		-46.6497		1057.31	319.772	322.308	173.82	27.9989	213.41		124.185	125.001	88.7288	340.87	368.263	5.09195	16.6737	6.11164	27.9989	1056.27
			East Asia			Livestock system inputs and outputs
Livestock feed				NPP sinks						Livestock system outcomes			Manure uses			Final outcomes
	total available in DM	total used in DM	Underground. NPP ratio	Total NPP	NPP remaining on land	NPP used	Relative digestibility			Food	Manure	Respiration	Fuel, material	Soil	Waste	Total meat	Losses of meat	Total soil	Fuel, material	Respiration	Other ecosystem serv.	Manure losses	TOTAL
Source	[8]	[8]	ass.	calculated			[8]			calculated			ass.	[12]	[12]	calculated
Unit	TgC	TgC		TgC												TgC
Grazing	603.634	285.469	0.5	579.489	442.464	137.025	0.289863			0.0404466	0.238416	0.721137	0	1	0	4.62104	0.921158	32.669	0	98.8137	442.464	0	579.489
Forage	see crops table					28.4652	0.368362			0.0514002	0.347652	0.600948	0.01	0.483627	0.496373	1.21993	0.243182	4.78597	0.0989599	17.1061	0	4.9121	28.3662
Feed						88.7288	1			0.139537	0.259515	0.600948	0.01	0.483627	0.496373	10.3232	2.05782	11.1362	0.230265	53.3214	0	11.4297	88.4986
Residuals						96.5354	0.289863			0.0514002	0.347652	0.600948	0.01	0.483627	0.496373	4.13722	0.824715	16.2309	0.335608	58.0127	0	16.6587	96.1998
TOTAL						350.754										20.3013	4.04687	64.8221	0.664832	227.254	442.464	33.0005	792.553
Livestock products										Food demand incr. to 2050	Demand under meat reduction scenario
	Livestock production	Livestock production in C	Agricultural wastage	Food wastage	Net trade - exports	Total meat
Source	[11]	calculated	[6]	[6]	[11]					[13]	[14]
Unit	TgC	TgC			TgC	TgC				%	TgC
Pig meat	52.3627	9.53044	0.08	0.14	-0.349295	7.70619				1.60193	1.52079
Beef and Buffalo Meat + (Total)	7.24984	1.31953	0.08	0.14	-0.184025	1.17277				1.60193	1.67778
Eggs Primary + (Total)	31.0652	6.64133	0.08	0.14	0.00157347	5.17901				1.60193	5.10088
Milk, Total + (Total)	47.905	3.42909	0.057	0.055	-0.373416	3.37663				1.67585	5.67949
Poultry Meat + (Total)	18.6858	3.40097	0.08	0.14	-0.27746	2.86918				1.60193	2.88573
Sheep and Goat Meat + (Total)	4.08327	0.743188	0.08	0.14	-0.0194239	0.594837				1.60193	0.968712
TOTAL	161.352	25.0645			-1.20205	20.8986					17.8334
References
[1]	Scarlat et al. (2010)
[2]	Haberl et al. (2007)
[3]	Roy et al. (2001)
[4]	Oerke and Dehne (1997)
[5]	Faostat (2013) Food Balance Sheets
[6]	Gustavsson (2012)
[7]	Biofuels platform (2012)
[8]	Wirsenius (2000)
[9]	after Smil (1999)
[10]	Streets et al. 2003
[11]	Faostat (2013) production
[12]	Conant et al. 2013
[13]	Alexandratos & Bruinsma (2012)
[14]	Willet (2001)

## Sheet: EEurope
			East Europe			Biomass flows									Confidence colour coding:				Good > Lower > Lowest
Crops	Plant growth uses					Harvest uses							Residue uses					Processing outcomes				Food
	Harvest	Residue (ag)	Residue (bg)	Other plants	Losses	Food	Seeds	Processing	Feed	Loss	Other	Biofuel	Feed	Fibre	Energy	Soil	Waste (burn)	Food	Feed	Energy	Loss	Waste
Notation	ph	pr	pbr	po	ploss	hd	hs	hp	hl	hloss	ho	hb	rl	rfib	ren	rs	rw	pf	pl	pe	pw	fw
Source	[1], [2]	[1]		ass.	[4]	[5]	[5]	[5]	[5]	[5], [6]	[5]	[7]	[8]	[9]	[9]	remainder	[10]	[5], [8]	[5], [8]	assumed	[5], [6]	[6]
Wheat	0.294783	0.366908	0.15	0.05	0.138309	0.0552649	0.119366	0.342715	0.382654	0.1	0	0	0.075	0.01	0.03	0.7388	0.1462	0.78	0.1122	0	0.1078	0.215
Rice	0.192532	0.34812	0.15	0.05	0.259348	0.845089	0.0355762	0	0.0193349	0.1	0	0	0	0.01	0.03	0.8087	0.1513	0.79	0.084	0	0.126	0.215
Barley	0.298676	0.377829	0.15	0.05	0.123495	0.00160457	0.118242	0.0965869	0.683566	0.1	0	0	0.075	0.01	0.03	0.7456	0.1394	0.5	0.45	0	0.05	0.215
Maize	0.308419	0.328058	0.15	0.05	0.163523	0.00934138	0.0108515	0.155168	0.596908	0.1	0	0.127731	0.09	0.01	0.03	0.7136	0.1564	0.79	0.105	0.042	0.063	0.215
Rye	0.283253	0.356494	0.15	0.05	0.160253	0.0491017	0.102687	0.329653	0.418559	0.1	0	0	0.075	0.01	0.03	0.7456	0.1394	0.79	0.0882	0	0.1218	0.215
Oats	0.264707	0.37745	0.15	0.05	0.157843	0.00731497	0.182674	0.00731497	0.702697	0.1	0	0	0.075	0.01	0.03	0.7456	0.1394	0.79	0.0882	0	0.1218	0.215
Millet	0.251046	0.392886	0.15	0.05	0.156068	0.226876	0.0446247	0.226876	0.401623	0.1	0	0	0.075	0.01	0.03	0.7456	0.1394	0.79	0.0882	0	0.1218	0.215
Sorghum	0.269188	0.372387	0.15	0.05	0.158426	-0.00211578	0.0243902	-0.0125184	0.890244	0.1	0	0	0.075	0.01	0.03	0.7456	0.1394	0.79	0.0882	0	0.1218	0.215
Cereals, Other	0.282233	0.357646	0.15	0.05	0.160121	0.0124603	0.06165	0	0.879795	0.1	0	0	0.075	0.01	0.03	0.7456	0.1394	0.79	0.0882	0	0.1218	0.215
Starchy Roots	0.282609	0.282609	0.15	0.05	0.234783	0.262394	0.204132	0.00947485	0.298999	0.225	0	0	0	0.01	0.03	0.8206	0.1394	0.79	0	0	0.21	0.17
Sugar Cane	0.343085	0.228723	0.15	0.05	0.228191	0	0	0	0	0	0	0	0	0.01	0.03	0.8444	0.1156	0.552968	0	0.402329	0.0447032	0.045
Sugar Beet	0.343085	0.228723	0.15	0.05	0.228191	0	0	0.909899	0.0844451	0.00565536	0	0	0.36	0	0	0.5006	0.1394	0.552968	0.402329	0	0.0447032	0.045
Pulses	0.290541	0.290541	0.15	0.05	0.218919	0.0160044	0.139392	0.0946926	0.589911	0.16	0	0	0	0	0	0.8606	0.1394	0.9	0	0	0.1	0.045
Treenuts	0.172	0.43	0.15	0.05	0.198	0.84	0	0	0	0.16	0	0	0	0	0	0.8606	0.1394	0.9	0.049	0	0.051	0.045
Oilcrops	0.219096	0.374593	0.15	0.05	0.206311	0.0196419	0.0344993	0.764435	0.0705662	0.119804	0	0	0	0	0	0.8606	0.1394	0.474168	0.473249	0	0.0525832	0.045
Soyabeans	0.30091	0.367779	0.15	0.05	0.131311	0.0036384	0.0618351	0.532505	0.242021	0.16	0	0	0	0	0	0.8844	0.1156	0.201388	0.793889	0	0	0.045
Vegetables	0.443299	0.110825	0.15	0.05	0.245876	0.0939947	0	0.570565	0.07544	0.26	0	0	0	0	0	0.8606	0.1394	0.9	0	0	0.1	0.28
Fruits	0.172	0.43	0.15	0.05	0.198	0.458964	0	0.259244	0.0217919	0.26	0	0	0	0	0	0.8606	0.1394	0.9	0	0	0.1	0.28
Cotton	0.195351	0.455818	0.15	0.05	0.148831	0	0.119366	0	0	0.1	0.780634	0	0	0	0	0.8606	0.1394	0.9	0	0	0.1	0
Forage crops	0.397986	0	0.4	0.202014	0	0	0	0	1	0	0	0	na	na	na	na	na	na	na	na	na	na
Other Crops	0.294783	0.366908	0.15	0.05	0.138309	0.0552649	0.119366	0.342715	0.382654	0.1	0	0	0.075	0.01	0.03	0.7388	0.1462	0.78	0.1122	0	0.1078	0.215
	Statistical data inputs				Calculated growth distribution in Carbon							Final outcomes
	Production	Av. Yields	Net trade - Exports		Real NPP	Harvest	Residue (above ground)	Residue (below ground)	Other plants	Losses and weeds		Food	Fodder	Feed	Losses	Soil	Fibre	Energy	Seed	Other ecosys. service	TOTAL
Source	[5]	[11]	[5]		calculated							calculated
Unit	TgC	t/ha	TgC		TgC							TgC
Wheat	114.626	2.7043	12.9638		155.345	45.7931	56.9973	23.3018	7.76726	21.4857		8.31328	5.53717	12.5623	36.5914	65.4114	0.569973	1.70992	3.9187	7.76726	155.345
Rice	0.789	5.2696	-0.21289		1.731	0.333274	0.602595	0.25965	0.08655	0.448931		0.362322	0	0.01056	0.693955	0.746968	0.00602595	0.0180778	0.0194304	0.08655	1.731
Barley	41.866	2.5569	4.48798		55.9987	16.7255	21.1579	8.3998	2.79993	6.91558		0.479341	2.11873	8.36513	11.2791	24.1751	0.211579	0.634737	1.44699	2.79993	55.9987
Maize	36.416	4.546	5.82414		48.5989	14.9888	15.9432	7.28984	2.42995	7.94706		0.949097	1.58421	5.47048	11.7066	18.6669	0.159432	1.70864	0.0994502	2.42995	48.5989
Rye	10.587	2.3399	0.393507		14.9319	4.22951	5.32314	2.23979	0.746596	2.39289		0.932067	0.510769	1.60559	3.92783	6.20872	0.0532314	0.159694	0.393907	0.746596	14.9319
Oats	8.739	1.9559	0.009588		13.189	3.49123	4.97821	1.97836	0.659452	2.0818		0.0357865	0.375612	2.44654	3.13683	5.69011	0.0497821	0.149346	0.636004	0.659452	13.189
Millet	0.434	1.1187	-0.0249216		0.730231	0.183322	0.286897	0.109535	0.0365115	0.113966		0.0663869	0.0256843	0.0836352	0.19872	0.323445	0.00286897	0.00860692	0.0092928	0.0365115	0.730231
Sorghum	0.08	1.8453	-0.0008448		0.125533	0.033792	0.0467469	0.01883	0.00627666	0.0198877		-0.000326422	0.00346778	0.0308352	0.0297257	0.0536845	0.000467469	0.00140241	0.0008448	0.00627666	0.125533
Cereals, Other	13.095	2.54151	0.345168		19.6263	5.53918	7.01926	2.94394	0.981314	3.14257		0.0508044	0.526445	4.56967	4.65437	8.1775	0.0701926	0.210578	0.320211	0.981314	19.9063
Starchy Roots	73.654	15.1857	-0.11902		28.6684	8.10194	8.10194	4.30026	1.43342	6.73084		1.84149	0	2.45806	10.1035	10.9487	0.0810194	0.243058	1.67816	1.43342	28.6684
Sugar Cane	0	1	0.0001		0	0	0	0	0	0		0	0	0	0	0	0	0	0	0	0.0001
Sugar Beet	55.61	37.0446	-2.04606		14.9769	5.13836	3.42558	2.24654	0.748847	3.41761		3.45215	3.86327	0.60669	4.39066	3.96138	0	0	0	0.748847	14.9769
Pulses	3.028	1.7825	0.182313		4.40849	1.28084	1.28084	0.661273	0.220424	0.965101		0.106198	0	0.648036	1.33482	1.76357	0	0	0.153126	0.220424	4.40849
Treenuts	0.197	2.6452	-0.08037		0.652849	0.11229	0.280725	0.0979273	0.0326424	0.129264		0.154552	0	0	0.206505	0.339519	0	0	0	0.0326424	0.652849
Oilcrops	26.136	2.1113	2.22203		57.0684	12.5035	21.3774	8.56026	2.85342	11.7738		3.75187	0	4.44502	16.5757	26.9577	0	0	0.354702	2.85342	57.1604
Soyabeans	2.222	1.4276	-0.384892		3.34064	1.00523	1.22862	0.501096	0.167032	0.438663		0.147199	0.587675	0.33644	0.810047	1.58769	0	0	0.0859585	0.167032	3.33715
Vegetables	38.953	18.8455	-0.303904		5.25467	2.32939	0.582347	0.7882	0.262733	1.292		1.15181	0	0.198656	2.65601	1.28937	0	0	0	0.262733	5.25467
Fruits	15.077	6.8091	-0.719739		7.49467	1.28908	3.22271	1.1242	0.374734	1.48394		1.00129	0	0.043776	2.89695	3.89766	0	0	0	0.374734	7.49467
Cotton	0.169662	1.0727	0		0.398641	0.0778749	0.181708	0.0597962	0.0199321	0.0593301		0	0	0	0.0924477	0.216174	0.0607918	0	0.00929559	0.0199321	0.398641
Forage crops	2162.15	29.05	0		651.814	259.413	0	260.726	131.675	0		0	259.413	0	0	260.726			0	131.675	651.814
Other	0.025526	0.00624709	0		0.0103893	0.00306259	0.00381191	0.00155839	0.000519465	0.00143694		0.000775531	0.000403658	0.00117191	0	0.00437464	3.81191e-05	0.000114357	0.000365568	0.000519465	0.00776325
TOTAL	441.679		22.536		1084.36	382.572	152.041	325.608	153.303	70.8389		22.7961	274.546	43.8826	111.285	441.146	1.2654	4.84417	9.12643	153.303	1084.73
			East Europe			Livestock system inputs and outputs
Livestock feed				NPP sinks						Livestock system outcomes			Manure uses			Final outcomes
	total available in DM	total used in DM	Underground. NPP ratio	Total NPP	NPP remaining on land	NPP used	Relative digestibility			Food	Manure	Respiration	Fuel, material	Soil	Waste	Total meat	Losses of meat	Total soil	Fuel, material	Respiration	Other ecosystem serv.	Manure losses	TOTAL
Source	[8]	[8]	ass.	calculated			[8]			calculated			ass.	[12]	[12]	calculated
Unit	TgC	TgC		TgC												TgC
Grazing	1004	520	0.0005	963.84	714.24	249.6	0.289863			0.0108406	0.480464	0.508418	0	1	0	2.35388	0.35194	119.924	0	126.901	714.24	0	963.771
Forrage	see crops table					259.413	0.368362			0.0137764	0.562311	0.423682	0.01	0.916075	0.0639254	3.10895	0.464833	133.628	1.45871	109.909	0	9.32483	257.894
Feed						43.8826	1			0.0373992	0.538688	0.423682	0.01	0.916075	0.0639254	1.42771	0.213463	21.6551	0.23639	18.5923	0	1.51113	43.636
Residuals						15.1334	0.289863			0.0137764	0.562311	0.423682	0.01	0.916075	0.0639254	0.181368	0.0271171	7.79552	0.085097	6.41177	0	0.543986	15.0449
TOTAL						568.029										7.07191	1.05735	283.003	1.78019	261.814	714.24	11.38	1280.35
Livestock products										Food demand incr. to 2050	Demand under meat reduction scenario
	Livestock production	Livestock production in C	Agricultural wastage	Food wastage	Net trade - exports	Total meat
Source	[11]	calculated	[6]	[6]	[11]					[13]	[14]
Unit	TgC	TgC			TgC	TgC				%	TgC
Pig meat	6.24839	1.09558	0.045	0.0875	-0.286335	1.19881				0.941972	0.233539
Beef and Buffalo Meat + (Total)	3.21208	0.563198	0.045	0.0875	-0.0775281	0.55583				0.941972	0.257647
Eggs Primary + (Total)	4.71411	0.970881	0.045	0.0875	0.0275358	0.818352				0.941972	0.528744
Milk,Total + (Total)	60.831	4.33139	0.052	0.075	0.353233	3.47293				0.912024	4.25166
Poultry Meat + (Total)	5.87016	1.02926	0.045	0.0875	-0.159745	1.03146				0.941972	0.697715
Sheep and Goat Meat + (Total)	0.297639	52.1873	0.045	0.0875	-0.000669789	45.2731				0.941972	0.0434147
TOTAL	81.1734	60.1776			-0.143509	52.3504					6.01272
References
[1]	Scarlat et al. (2010)
[2]	Haberl et al. (2007)
[3]	Roy et al. (2001)
[4]	Oerke and Dehne (1997)
[5]	Faostat (2013) Food Balance Sheets
[6]	Gustavsson (2012)
[7]	Biofuels platform (2012)
[8]	Wirsenius (2000)
[9]	after Smil (1999)
[10]	assumed
[11]	Faostat (2013) production
[12]	Conant et al. 2013
[13]	Alexandratos & Bruinsma (2012)
[14]	Willet (2001)

## Sheet: CCSAmerica
			Latin America			Biomass flows									Confidence colour coding:				Good > Lower > Lowest
Crops	Plant growth uses					Harvest uses							Residue uses					Processing outcomes				Food
	Harvest	Residue (ag)	Residue (bg)	Other plants	Losses	Food	Seeds	Processing	Feed	Loss	Other	Biofuel	Feed	Fibre	Energy	Soil	Waste (burn)	Food	Feed	Energy	Loss	Waste
Notation	ph	pr	pbr	po	ploss	hd	hs	hp	hl	hloss	ho	hb	rl	rfib	ren	rs	rw	pf	pl	pe	pw	fw
Source	[1], [2]	[1]		ass.	[4]	[5]	[5]	[5]	[5]	[5], [6]	[5]	[7]	[8]	[9]	[9]	remainder	[10]	[5], [8]	[5], [8]	assumed	[5], [6]	[6]
Wheat	0.295486	0.366126	0.15	0.05	0.138387	0.120387	0.0260309	0.712288	0.0412944	0.1	0	0	0.48	0.01	0.03	0.45	0.03	0.73	0.1377	0	0.1323	0.14
Rice	0.18322	0.359545	0.15	0.05	0.257234	0.804369	0.0185035	0.0529812	0.024146	0.1	0	0	0.48	0.01	0.03	0.28	0.2	0.69	0.124	0	0.186	0.14
Barley	0.294924	0.381951	0.15	0.05	0.123124	0.00571074	0.0263209	0.719333	0.148636	0.1	0	0	0.48	0.01	0.03	0.48	0	0.5	0.45	0	0.05	0.14
Maize	0.302024	0.335284	0.15	0.05	0.162692	0.0413319	0.00980201	0.265906	0.58296	0.1	0	0	0.54	0.01	0.03	0.42	0	0.69	0.155	0.062	0.093	0.14
Rye	0.260298	0.382432	0.15	0.05	0.15727	0.039759	0.15	0.235241	0.475	0.1	0	0	0.48	0.01	0.03	0.48	0	0.69	0.1302	0	0.1798	0.14
Oats	0.264528	0.377652	0.15	0.05	0.15782	0.169952	0.0833333	0.169952	0.476763	0.1	0	0	0.48	0.01	0.03	0.48	0	0.69	0.1302	0	0.1798	0.14
Millet	0.260378	0.382341	0.15	0.05	0.157281	0	0	0	0.9	0.1	0	0	0.48	0.01	0.03	0.48	0	0.69	0.1302	0	0.1798	0.14
Sorghum	0.290485	0.348322	0.15	0.05	0.161193	-0.0082984	0.00518446	-0.0490989	0.952213	0.1	0	0	0.48	0.01	0.03	0.48	0	0.69	0.1302	0	0.1798	0.14
Cereals, Other	0.281307	0.358693	0.15	0.05	0.16	0.0940204	0.00658762	0.562238	0.237154	0.1	0	0	0.48	0.01	0.03	0.48	0	0.69	0.1302	0	0.1798	0.14
Starchy Roots	0.282609	0.282609	0.15	0.05	0.234783	0.416886	0.0279054	0.00129334	0.273916	0.28	0	0	0.42	0.01	0.03	0.54	0	0.69	0	0	0.31	0.07
Sugar Cane	0.343085	0.228723	0.15	0.05	0.228191	0.00407763	0.000494557	0.974561	0.0154834	0.00538306	0	0	0.54	0.01	0.03	-0.08	0.5	0.188714	0	0.841443	0.0811286	0.04
Sugar Beet	0.343085	0.228723	0.15	0.05	0.228191	0.0464904	0	0.949863	0.00364631	0	0	0	0	0	0	1	0	0.234414	0.689027	0	0.0765586	0.04
Pulses	0.290541	0.290541	0.15	0.05	0.218919	0.124422	0.0429132	0.736166	0.0064979	0.09	0	0	0.42	0	0	0.58	0	0.9	0	0	0.1	0.04
Treenuts	0.172	0.43	0.15	0.05	0.198	0.91	0	0	0	0.09	0	0	0.42	0	0	0.58	0	0.9	0.049	0	0.051	0.04
Oilcrops	0.212542	0.382303	0.15	0.05	0.205155	0.236125	0.024959	0.649591	0.026367	0.0649197	0	0	0.42	0	0	0.58	0	0.613907	0.347484	0	0.0386093	0.04
Soyabeans	0.30091	0.367779	0.15	0.05	0.131311	0.00861549	0.0282849	0.853549	0.0195501	0.09	0	0	0.48	0	0	0.52	0	0.202021	0.797979	0	0	0.04
Vegetables	0.443299	0.110825	0.15	0.05	0.245876	0.0980298	0.000936846	0.580009	0.0210239	0.3	0	0	0.42	0	0	0.58	0	0.9	0	0	0.1	0.22
Fruits	0.172	0.43	0.15	0.05	0.198	0.515336	0	0.172461	0.0122034	0.3	0	0	0	0	0	1	0	0.9	0	0	0.1	0.22
Cotton	0.195351	0.455818	0.15	0.05	0.148831	0	0.0260309	0	0	0.1	0.873969	0	0	0	0	1	0	0.9	0	0	0.1	0
Forage crops	0.391275	0	0.4	0.208725	0	0	0	0	1	0	0	0	na	na	na	na	na	na	na	na	na	na
Other Crops	0.295486	0.366126	0.15	0.05	0.138387	0.120387	0.0260309	0.712288	0.0412944	0.1	0	0	0.48	0.01	0.03	0.45	0.03	0.73	0.1377	0	0.1323	0.14
	Statistical data inputs				Calculated growth distribution in Carbon							Final outcomes
	Production	Av. Yields	Net trade - Exports		Real NPP	Harvest	Residue (above ground)	Residue (below ground)	Other plants	Losses and weeds		Food	Fodder	Feed	Losses	Soil	Fibre	Energy	Seed	Other ecosys. service	TOTAL
Source	[5]	[11]	[5]		calculated							calculated
Unit	TgC	t/ha	TgC		TgC							TgC
Wheat	22.591	2.74642	-4.48039		30.5432	9.0251	11.1827	4.58148	1.52716	4.2268		7.43757	6.69233	0.557702	8.39629	9.61369	0.111827	0.33548	0.35156	1.52716	30.5432
Rice	18.849	4.6464	-0.347635		43.4548	7.96182	15.624	6.51823	2.17274	11.1781		6.00937	7.55411	0.20064	16.194	10.8929	0.15624	0.46872	0.153754	2.17274	43.4548
Barley	2.93	2.35357	-0.893682		3.96893	1.17053	1.51594	0.59534	0.198447	0.488672		0.648627	1.39584	0.306816	0.874928	1.32299	0.0151594	0.0454782	0.054332	0.198447	3.96893
Maize	98.459	3.51559	-1.59166		134.181	40.5257	44.9885	20.1271	6.70903	21.8301		8.14272	26.0297	24.5528	28.409	39.0223	0.449885	2.04401	0.412835	6.70903	134.181
Rye	0.038	1.16139	-0.000799		0.0583217	0.015181	0.0223041	0.00874825	0.00291608	0.00917227		0.00277708	0.0111954	0.0075905	0.0118982	0.0194542	0.000223041	0.000669122	0.002397	0.00291608	0.0583217
Oats	0.988	1.97404	-0.10387		1.49212	0.394706	0.563501	0.223817	0.0746058	0.235486		0.123152	0.281513	0.237702	0.320627	0.494298	0.00563501	0.016905	0.041548	0.0746058	1.49212
Millet	0.008	1.45982	-0.0033792		0.0129781	0.0033792	0.00496205	0.00194671	0.000648903	0.0020412		0	0.00238178	0.00608256	0.00271704	0.00432849	4.96205e-05	0.000148862	0	0.000648903	0.0129781
Sorghum	11.045	3.0661	-0.956314		16.0607	4.66541	5.59431	2.40911	0.803037	2.58888		-0.20391	2.64933	5.35308	3.06823	5.09438	0.0559431	0.167829	0.0291456	0.803037	16.0607
Cereals, Other	0.364	2.48682	-0.167085		0.547346	0.153972	0.196329	0.0821019	0.0273673	0.0875755		0.133075	0.11774	0.07614	0.1738	0.17634	0.00196329	0.00588987	0.002115	0.0273673	0.547346
Starchy Roots	54.346	12.8299	-0.08063		21.1531	5.97806	5.97806	3.17297	1.05766	4.96639		2.354	2.51079	1.65957	6.84243	6.40112	0.0597806	0.179342	0.16907	1.05766	21.1531
Sugar Cane	896.417	77.9116	8.57187		338.62	116.176	77.4504	50.7931	16.931	77.2703		19.4194	41.8232	1.66607	125.892	44.597	0.774504	90.5626	0.0532161	16.931	350.291
Sugar Beet	1.097	69.6952	0.0098676		0.295445	0.101363	0.0675752	0.0443168	0.0147723	0.067418		0.023641	0.0598819	0.00033362	0.0750566	0.111892	0	0	0	0.0147723	0.295445
Pulses	6.902	0.900802	-0.205155		10.0487	2.91955	2.91955	1.5073	0.502433	2.19984		2.36069	1.22621	0.020304	2.80946	3.20064	0	0	0.134091	0.502433	10.0487
Treenuts	0.672	0.694783	0.12825		2.22698	0.38304	0.9576	0.334047	0.111349	0.440941		0.222585	0.402192	0	0.473147	0.889455	0	0	0	0.111349	2.22698
Oilcrops	13.269	1.73396	-1.91206		29.8665	6.34789	11.418	4.47997	1.49332	6.12724		5.03458	4.79558	2.08224	7.08041	11.1024	0	0	0.20616	1.49332	29.8827
Soyabeans	95.223	2.2329	10.6714		143.162	43.0789	52.652	21.4743	7.1581	18.7987		5.6327	47.3462	0.633569	21.9501	48.8533	0	0	0.916644	7.1581	143.162
Vegetables	42.069	15.4305	0.345465		5.67501	2.51573	0.628932	0.851252	0.283751	1.39535		1.0496	0.264151	0.0456274	2.46835	1.21603	0	0	0.0020332	0.283751	5.67501
Fruits	109.04	14.8001	2.75105		54.203	9.32292	23.3073	8.13045	2.71015	10.7322		3.43728	0	0.080199	13.7866	31.4378	0	0	0	2.71015	54.203
Cotton	1.80584	0.971759	0		4.24303	0.828879	1.93405	0.636454	0.212151	0.631494		0	0	0	0.714382	2.5705	0.724414	0	0.0215764	0.212151	4.24303
Forage crops	423.289	27.953	0		129.796	50.7858	0	51.9182	27.0916	0		0	50.7858	0	0	51.9182			0	27.0916	129.796
Other	48.6271	27.7085	0		19.7445	5.83424	7.22899	2.96168	0.987227	2.73239		3.21296	4.04215	0.240922	0	6.21473	0.0722899	0.21687	0.15187	0.987227	15.139
TOTAL	1376.11		11.7352		989.353	308.188	264.235	180.852	70.0695	163.277		65.0409	197.99	37.7274	239.543	275.154	2.42791	94.044	2.70235	70.0695	996.434
			Latin America			Livestock system inputs and outputs
Livestock feed				NPP sinks						Livestock system outcomes			Manure uses			Final outcomes
	total available in DM	total used in DM	Underground. NPP ratio	Total NPP	NPP remaining on land	NPP used	Relative digestibility			Food	Manure	Respiration	Fuel, material	Soil	Waste	Total meat	Losses of meat	Total soil	Fuel, material	Respiration	Other ecosystem serv.	Manure losses	TOTAL
Source	[8]	[8]	ass.	calculated			[8]			calculated			ass.	[12]	[12]	calculated
Unit	TgC	TgC		TgC												TgC
Grazing	3632	1691	0.5	3486.72	2675.04	811.68	0.289863			0.0123812	0.442808	0.54481	0	1	0	7.43612	2.61345	359.419	0	442.212	2675.04	0	3486.72
Forage	see crops table					50.7858	0.368362			0.0157342	0.530257	0.454009	0.01	0.352974	0.627026	0.59127	0.207804	9.50541	0.269295	23.0572	0	16.8855	50.5165
Feed						37.7274	1			0.042714	0.503277	0.454009	0.01	0.352974	0.627026	1.19241	0.419077	6.70202	0.189873	17.1285	0	11.9056	37.5375
Residuals						147.204	0.289863			0.0157342	0.530257	0.454009	0.01	0.352974	0.627026	1.71382	0.602327	27.5518	0.780562	66.8321	0	48.9433	146.424
TOTAL						1047.4										10.9336	3.84266	403.178	1.23973	549.23	2675.04	77.7344	3721.2
Livestock products										Food demand incr. to 2050	Demand under meat reduction scenario
	Livestock production	Livestock production in C	Agricultural wastage	Food wastage	Net trade - exports	Total meat
Source	[11]	calculated	[6]	[6]	[11]					[13]	[14]
Unit	TgC	TgC			TgC	TgC				%	TgC
Pig meat	6.47778	1.22425	0.114	0.11	0.0298056	0.92689				1.8099	0.740404
Beef and Buffalo Meat + (Total)	18.2237	3.44414	0.114	0.11	0.40673	2.35703				1.8099	0.816832
Eggs Primary + (Total)	7.11756	1.58004	0.114	0.11	0.00295026	1.22382				1.8099	1.28476
Milk,Total + (Total)	69.615	5.3097	0.115	0.12	-0.230516	4.23826				1.65416	7.1024
Poultry Meat + (Total)	20.2143	3.82036	0.114	0.11	0.431344	2.62987				1.8099	2.60355
Sheep and Goat Meat + (Total)	0.433167	0.0818653	0.114	0.11	-0.000502342	0.0639173				1.8099	0.117376
TOTAL	122.082	15.4603			0.639812	11.4398					12.6653
References
[1]	Scarlat et al. (2010)
[2]	Haberl et al. (2007)
[3]	Roy et al. (2001)
[4]	Oerke and Dehne (1997)
[5]	Faostat (2013) Food Balance Sheets
[6]	Gustavsson (2012)
[7]	Biofuels platform (2012)
[8]	Wirsenius (2000)
[9]	after Smil (1999)
[10]	assumed
[11]	Faostat (2013) production
[12]	Conant et al. 2013
[13]	Alexandratos & Bruinsma (2012)
[14]	Willet (2001)

## Sheet: NAfrica
			North Africa			Biomass flows									Confidence colour coding:				Good > Lower > Lowest
Crops	Plant growth uses					Harvest uses							Residue uses					Processing outcomes				Food
	Harvest	Residue (ag)	Residue (bg)	Other plants	Losses	Food	Seeds	Processing	Feed	Loss	Other	Biofuel	Feed	Fibre	Energy	Soil	Waste (burn)	Food	Feed	Energy	Loss	Waste
Notation	ph	pr	pbr	po	ploss	hd	hs	hp	hl	hloss	ho	hb	rl	rfib	ren	rs	rw	pf	pl	pe	pw	fw
Source	[1], [2]	[1]		ass.	[4]	[5]	[5]	[5]	[5]	[5], [6]	[5]	[7]	[8]	[9]	[9]	remainder	[10]	[5], [8]	[5], [8]	assumed	[5], [6]	[6]
Wheat	0.294825	0.366861	0.15	0.05	0.138314	0.110523	0.0216273	0.65393	0.0739193	0.14	0	0	0.48	0.01	0.03	0.265	0.215	0.73	0.1377	0	0.1323	0.16
Rice	0.252439	0.274614	0.15	0.05	0.272946	0.815442	0.0112676	0	0.0332907	0.14	0	0	0.48	0.01	0.03	0.2575	0.2225	0.69	0.124	0	0.186	0.16
Barley	0.279933	0.398425	0.15	0.05	0.121642	0.0420564	0.0698998	0.268991	0.479053	0.14	0	0	0.48	0.01	0.03	0.275	0.205	0.5	0.45	0	0.05	0.16
Maize	0.328034	0.305894	0.15	0.05	0.166072	0.0460831	0.00220155	0.279655	0.53206	0.14	0	0	0.54	0.01	0.03	0.19	0.23	0.69	0.155	0.062	0.093	0.16
Rye	0.271076	0.370253	0.15	0.05	0.158671	0	0	0	0	0	0	0	0.48	0.01	0.03	0.275	0.205	0.69	0.1302	0	0.1798	0.16
Oats	0.251784	0.392052	0.15	0.05	0.156164	-0.0212195	0.0813008	-0.0212195	0.821138	0.14	0	0	0.48	0.01	0.03	0.275	0.205	0.69	0.1302	0	0.1798	0.16
Millet	0.210835	0.438322	0.15	0.05	0.150843	0.408479	0.0157819	0.408479	0.0272597	0.14	0	0	0.48	0.01	0.03	0.275	0.205	0.69	0.1302	0	0.1798	0.16
Sorghum	0.237491	0.408203	0.15	0.05	0.154307	0.0938228	0.0155123	0.586802	0.163863	0.14	0	0	0.48	0.01	0.03	0.275	0.205	0.69	0.1302	0	0.1798	0.16
Cereals, Other	0.282561	0.357275	0.15	0.05	0.160163	0.0218182	0.00909091	0.129091	0.7	0.14	0	0	0.48	0.01	0.03	0.275	0.205	0.69	0.1302	0	0.1798	0.16
Starchy Roots	0.282609	0.282609	0.15	0.05	0.234783	0.760988	0.0768821	0	0.0021297	0.16	0	0	0.42	0.01	0.03	0.335	0.205	0.69	0	0	0.31	0.1
Sugar Cane	0.343085	0.228723	0.15	0.05	0.228191	0.144045	0.00675903	0.791513	0.0520151	0.00566751	0	0	0.54	0.01	0.03	0.25	0.17	0.406524	0	0.534128	0.0593476	0.04
Sugar Beet	0.343085	0.228723	0.15	0.05	0.228191	0	0	0.987634	0.0123655	0	0	0	0.36	0	0	0.435	0.205	0.406524	0.534128	0	0.0593476	0.04
Pulses	0.290541	0.290541	0.15	0.05	0.218919	0.0910575	0.0429483	0.538757	0.117237	0.21	0	0	0.42	0	0	0.375	0.205	0.9	0	0	0.1	0.04
Treenuts	0.172	0.43	0.15	0.05	0.198	0.79	0	0	0	0.21	0	0	0.42	0	0	0.375	0.205	0.9	0.049	0	0.051	0.04
Oilcrops	0.290541	0.290541	0.15	0.05	0.218919	0.218525	0.00469851	0.611231	0.000551147	0.16503	0	0	0.42	0	0	0.375	0.205	0.26428	0.662148	0	0.073572	0.04
Soyabeans	0.30091	0.367779	0.15	0.05	0.131311	0.0109807	0	0.779019	0	0.21	0	0	0.48	0	0	0.35	0.17	0.197121	0.802879	0	0	0.04
Vegetables	0.443299	0.110825	0.15	0.05	0.245876	0.105209	0	0.622484	0.00230773	0.27	0	0	0.42	0	0	0.375	0.205	0.9	0	0	0.1	0.27
Fruits	0.172	0.43	0.15	0.05	0.198	0.573548	0	0.151788	0.00466446	0.27	0	0	0	0	0	0.795	0.205	0.9	0	0	0.1	0.27
Cotton	0.195351	0.455818	0.15	0.05	0.148831	0	0.0216273	0	0	0.14	0.838373	0	0	0	0	0.795	0.205	0.9	0	0	0.1	0
Forage crops	0.397222	0	0.4	0.202778	0	0	0	0	1	0	0	0	na	na	na	na	na	na	na	na	na	na
Other Crops	0.294825	0.366861	0.15	0.05	0.138314	0.110523	0.0216273	0.65393	0.0739193	0.14	0	0	0.48	0.01	0.03	0.265	0.215	0.73	0.1377	0	0.1323	0.16
	Statistical data inputs				Calculated growth distribution in Carbon							Final outcomes
	Production	Av. Yields	Net trade - Exports		Real NPP	Harvest	Residue (above ground)	Residue (below ground)	Other plants	Losses and weeds		Food	Fodder	Feed	Losses	Soil	Fibre	Energy	Seed	Other ecosys. service	TOTAL
Source	[5]	[11]	[5]		calculated							calculated
Unit	TgC	t/ha	TgC		TgC							TgC
Wheat	20.248	2.7068	-5.96813		27.4369	8.08908	10.0655	4.11553	1.37184	3.7949		6.94186	6.09725	1.0391	10.4654	6.7829	0.100655	0.301966	0.304019	1.37184	27.4369
Rice	3.731	9.4843	-0.0734976		6.24299	1.57597	1.71441	0.936448	0.312149	1.704		1.12984	0.822919	0.054912	2.53159	1.37791	0.0171441	0.0514324	0.0185856	0.312149	6.24299
Barley	3.681	1.6531	-0.284044		5.25325	1.47056	2.09303	0.787988	0.262663	0.639015		0.260214	1.21704	0.840548	1.38689	1.36357	0.0209303	0.0627909	0.122646	0.262663	5.25325
Maize	7.96	6.3919	-4.20202		9.98781	3.27634	3.05521	1.49817	0.49939	1.6587		1.50164	1.97398	3.97894	3.88889	2.07866	0.0305521	0.221321	0.016464	0.49939	9.98781
Rye	0.101	1.9365	-0.003995		0.148849	0.0403495	0.055112	0.0223274	0.00744247	0.0236181		0	0.0264538	0	0.034916	0.0374832	0.00055112	0.00165336	0	0.00744247	0.104505
Oats	0.122	1.1433	-0.0003995		0.193575	0.048739	0.0758915	0.0290362	0.00967875	0.0302294		-0.00148021	0.0362922	0.0403495	0.0521972	0.0499064	0.000758915	0.00227675	0.003995	0.00967875	0.193575
Millet	0.642	0.2714	-0.023232		1.28622	0.271181	0.56378	0.192933	0.0643111	0.194018		0.170723	0.286272	0.0080256	0.404952	0.347973	0.0056378	0.0169134	0.0046464	0.0643111	1.28622
Sorghum	4.985	0.7322	0.172339		8.86631	2.10566	3.61925	1.32995	0.443315	1.36813		0.809912	1.88495	0.3168	2.73899	2.32524	0.0361925	0.108578	0.0299904	0.443315	8.86631
Cereals, Other	0.083	2.56109	-0.011421		0.124253	0.035109	0.0443924	0.0186379	0.00621263	0.0199007		0.00433419	0.0220904	0.032571	0.0374209	0.0308458	0.000443924	0.00133177	0.000423	0.00621263	0.124253
Starchy Roots	9.335	22.7002	-0.00616		3.63347	1.02685	1.02685	0.54502	0.181673	0.853075		0.707498	0.431277	0.0022	1.30747	0.889015	0.0102685	0.0308055	0.07942	0.181673	3.63347
Sugar Cane	23.822	110.542	-1.22646		8.99873	3.08733	2.05822	1.34981	0.449937	2.05343		1.92905	1.11144	0.224382	2.71079	1.86437	0.0205822	1.88548	0.029157	0.449937	8.99873
Sugar Beet	8.087	50.0643	-0.314629		2.178	0.747239	0.498159	0.3267	0.1089	0.497001		0.409284	0.739497	0.0131305	0.678417	0.543399	0	0	0	0.1089	2.178
Pulses	1.117	1.0625	-0.256338		1.62625	0.472491	0.472491	0.243937	0.0813124	0.356016		0.40297	0.198446	0.085446	0.661988	0.421121	0	0	0.031302	0.0813124	1.62625
Treenuts	0.296	0.6524	-0.0342		0.98093	0.16872	0.4218	0.14714	0.0490465	0.194224		0.153895	0.177156	0	0.329719	0.305315	0	0	0	0.0490465	0.98093
Oilcrops	4.712	1.8762	-0.452736		7.75871	2.25422	2.25422	1.16381	0.387936	1.69853		0.987656	0.946773	1.09707	2.77026	2.00914	0	0	0.0127187	0.387936	7.75881
Soyabeans	0.023	2.8654	-0.970837		0.0345791	0.0104052	0.0127175	0.00518687	0.00172896	0.00454062		0.154997	0.61983	0	0.219222	0.00963798	0	0	0	0.00172896	0.0345791
Vegetables	37.457	22.231	0.0114218		5.05286	2.23993	0.559982	0.757929	0.252643	1.24238		1.08255	0.235193	0.0051428	2.49799	0.967923	0	0	0	0.252643	5.05286
Fruits	21.055	11.9834	0.0955035		10.4663	1.8002	4.50051	1.56994	0.523315	2.07233		0.883741	0	0.0079515	3.80794	5.14785	0	0	0	0.523315	10.4663
Cotton	0.169244	0.6372	0		0.397659	0.077683	0.18126	0.0596489	0.019883	0.059184		0	0	0	0.107218	0.203751	0.0651273	0	0.00168007	0.019883	0.397659
Forage crops	58.6461	14.0972	0		17.7138	7.03631	0	7.08551	3.59196	0		0	7.03631	0	0	7.08551			0	3.59196	17.7138
Other	6.25388	1.13208	0		2.54502	0.750335	0.933669	0.381753	0.127251	0.352012		0.370538	0.515726	0.0554643	0	0.629175	0.00933669	0.0280101	0.0162277	0.127251	1.75173
TOTAL	147.626		-13.5488		120.926	36.5847	34.2065	22.5674	8.75259	18.4632		17.8992	24.3789	7.80203	36.6323	34.4707	0.318181	2.71256	0.671276	8.75259	120.089
			North Africa			Livestock system inputs and outputs
Livestock feed				NPP sinks						Livestock system outcomes			Manure uses			Final outcomes
	total available in DM	total used in DM	Underground. NPP ratio	Total NPP	NPP remaining on land	NPP used	Relative digestibility			Food	Manure	Respiration	Fuel, material	Soil	Waste	Total meat	Losses of meat	Total soil	Fuel, material	Respiration	Other ecosystem serv.	Manure losses	TOTAL
Source	[8]	[8]	ass.	calculated			[8]			calculated			ass.	[12]	[12]	calculated
Unit	TgC	TgC		TgC												TgC
Grazing	486.833	237.895	0.0005	467.36	353.17	114.189	0.289863			0.0146415	0.709555	0.275804	0	1	0	1.44958	0.222333	81.0237	0	31.4939	353.17	0	467.36
Forage	see crops table					7.03631	0.368362			0.0186067	0.751557	0.229836	0.01	0.308195	0.671805	0.113512	0.0174102	1.62979	0.0528818	1.6172	0	3.55263	6.98342
Feed						7.80203	1			0.050512	0.719652	0.229836	0.01	0.308195	0.671805	0.341688	0.0524073	1.73043	0.0561474	1.79319	0	3.77201	7.74588
Residuals						17.3426	0.289863			0.0186067	0.751557	0.229836	0.01	0.308195	0.671805	0.279776	0.0429114	4.01699	0.130339	3.98596	0	8.75627	17.2122
TOTAL						146.37										2.18455	0.335062	88.4009	0.239369	38.8902	353.17	16.0809	499.301
Livestock products										Food demand incr. to 2050	Demand under meat reduction scenario
	Livestock production	Livestock production in C	Agricultural wastage	Food wastage	Net trade - exports	Total meat
Source	[11]	calculated	[6]	[6]	[11]					[13]	[14]
Unit	TgC	TgC			TgC	TgC				%	TgC
Pig meat	0.001406	0.000266929	0.118	0.13	0	0.00020073				2.4485	0.000501515
Beef and Buffalo Meat + (Total)	2.49154	0.473019	0.118	0.13	-0.0405223	0.386183				2.4485	0.975044
Eggs Primary + (Total)	0.847852	0.189069	0.118	0.13	-0.00275358	0.144251				2.4485	0.361095
Milk,Total + (Total)	16.943	1.29228	0.115	0.1	-0.268114	1.22491				1.92738	2.44894
Poultry Meat + (Total)	1.89306	0.359396	0.118	0.13	-0.00468853	0.273792				2.4485	0.685234
Sheep and Goat Meat + (Total)	1.07758	0.204579	0.118	0.13	-0.000669789	0.154347				2.4485	0.385797
TOTAL	23.2544	2.51861			-0.316748	2.18368					4.85661
References
[1]	Scarlat et al. (2010)
[2]	Haberl et al. (2007)
[3]	Roy et al. (2001)
[4]	Oerke and Dehne (1997)
[5]	Faostat (2013) Food Balance Sheets
[6]	Gustavsson (2012)
[7]	Biofuels platform (2012)
[8]	Wirsenius (2000)
[9]	after Smil (1999)
[10]	assumed
[11]	Faostat (2013) production
[12]	Conant et al. 2013
[13]	Alexandratos & Bruinsma (2012)
[14]	Willet (2001)

## Sheet: NAmerica
			North America			Biomass flows									Confidence colour coding:				Good > Lower > Lowest
Crops	Plant growth uses					Harvest uses							Residue uses					Processing outcomes				Food
	Harvest	Residue (ag)	Residue (bg)	Other plants	Losses	Food	Seeds	Processing	Feed	Loss	Other	Biofuel	Feed	Fibre	Energy	Soil	Waste (burn)	Food	Feed	Energy	Loss	Waste
Notation	ph	pr	pbr	po	ploss	hd	hs	hp	hl	hloss	ho	hb	rl	rfib	ren	rs	rw	pf	pl	pe	pw	fw
Source	[1], [2]	[1]		ass.	[4]	[5]	[5]	[5]	[5]	[5], [6]	[5]	[7]	[8]	[9]	[9]	remainder	[10]	[5], [8]	[5], [8]	assumed	[5], [6]	[6]
Wheat	0.334279	0.406605	0.15	0.02	0.0891156	0.100118	0.0691955	0.595498	0.195188	0.04	0	0	0.035	0.01	0.03	0.895	0.03	0.73	0.1377	0	0.1323	0.29
Rice	0.287185	0.374909	0.15	0.02	0.167906	0.670168	0.0275608	0.0913338	0	0.210938	0	0	0	0.01	0.03	0.76	0.2	0.69	0.124	0	0.186	0.29
Barley	0.347917	0.401816	0.15	0.02	0.0802665	0.00178302	0.0280189	0.331619	0.598579	0.04	0	0	0.035	0.01	0.03	0.925	0	0.5	0.45	0	0.05	0.29
Maize	0.377327	0.345785	0.15	0.02	0.106888	0.00224465	0.00127807	0.128962	0.476145	0.04	0	0.35137	0.045	0.01	0.03	0.915	0	0.69	0.155	0.062	0.093	0.29
Rye	0.317812	0.409987	0.15	0.02	0.102201	0.0588403	0.178279	0.384766	0.338115	0.04	0	0	0.035	0.01	0.03	0.925	0	0.69	0.1302	0	0.1798	0.29
Oats	0.292965	0.436791	0.15	0.02	0.100244	0.130324	0.0695201	0.130324	0.629831	0.04	0	0	0.035	0.01	0.03	0.925	0	0.69	0.1302	0	0.1798	0.29
Millet	0.30653	0.422157	0.15	0.02	0.101313	0	0	0	0.940828	0.06	0	0	0.035	0.01	0.03	0.925	0	0.69	0.1302	0	0.1798	0.29
Sorghum	0.350067	0.375192	0.15	0.02	0.104741	0.00778834	0.00392724	0.212236	0.736048	0.04	0	0	0.035	0.01	0.03	0.925	0	0.69	0.1302	0	0.1798	0.29
Cereals, Other	0.339687	0.38639	0.15	0.02	0.103924	0.0276827	0.0789474	0.414773	0.438596	0.04	0	0	0.035	0.01	0.03	0.925	0	0.69	0.1302	0	0.1798	0.29
Starchy Roots	0.341579	0.341579	0.15	0.02	0.146842	0.630711	0.0554226	0	0.013866	0.3	0	0	0	0.01	0.03	0.96	0	0.69	0	0	0.31	0.37
Sugar Cane	0.410426	0.273617	0.15	0.02	0.145956	0	0.0596918	0.940308	0	0	0	0	0	0.01	0.03	0.46	0.5	0.493698	0	0.455672	0.0506302	0.05
Sugar Beet	0.410426	0.273617	0.15	0.02	0.145956	0	0	0.99953	0.000469721	0	0	0	0.54	0	0	0.46	0	0.493698	0.455672	0	0.0506302	0.05
Pulses	0.345433	0.345433	0.15	0.02	0.139134	0.0734905	0.197616	0.434819	0.169075	0.125	0	0	0	0	0	1	0	0.9	0	0	0.1	0.05
Treenuts	0.201701	0.504253	0.15	0.02	0.124046	0.875	0	0	0	0.125	0	0	0	0	0	1	0	0.9	0.049	0	0.051	0.05
Oilcrops	0.255725	0.444558	0.15	0.02	0.129717	0.106733	0.0235303	0.494581	0.2713	0.103855	0	0	0	0	0	1	0	0.279957	0.384771	0.292519	0.0427523	0.05
Soyabeans	0.335708	0.41031	0.15	0.02	0.0839814	0.000633895	0.0488866	0.883929	0.0465506	0.02	0	0	0	0	0	1	0	0.24756	0.677196	0.0324381	0.0428058	0.05
Vegetables	0.536636	0.134159	0.15	0.02	0.159205	0.0976261	0.000360393	0.577621	0.00439229	0.32	0	0	0	0	0	1	0	0.9	0	0	0.1	0.24
Fruits	0.201701	0.504253	0.15	0.02	0.124046	0.49247	0	0.18753	0	0.32	0	0	0	0	0	1	0	0.9	0	0	0.1	0.24
Cotton	0.220635	0.514816	0.15	0.02	0.0945484	0	0.0691955	0	0	0.04	0.890804	0	0	0	0	1	0	0.9	0	0	0.1	0
Forage crops	0.392683	0	0.4	0.207317	0	0	0	0	1	0	0	0	na	na	na	na	na	na	na	na	na	na
Other Crops	0.334279	0.406605	0.15	0.02	0.0891156	0.100118	0.0691955	0.595498	0.195188	0.04	0	0	0.035	0.01	0.03	0.895	0.03	0.73	0.1377	0	0.1323	0.29
	Statistical data inputs				Calculated growth distribution in Carbon							Final outcomes
	Production	Av. Yields	Net trade - Exports		Real NPP	Harvest	Residue (above ground)	Residue (below ground)	Other plants	Losses and weeds		Food	Fodder	Feed	Losses	Soil	Fibre	Energy	Seed	Other ecosys. service	TOTAL
Source	[5]	[11]	[5]		calculated							calculated
Unit	TgC	t/ha	TgC		TgC							TgC
Wheat	87.213	2.9237	19.1492		104.229	34.8416	42.38	15.6343	2.08458	9.28842		5.95887	2.77008	3.06297	14.8577	53.5645	0.4238	1.2714	1.08584	2.08458	104.229
Rice	6.651	7.9413	0.862963		9.78248	2.80938	3.66754	1.46737	0.19565	1.64253		1.01324	0.022044	0	3.23354	4.2547	0.0366754	0.110026	0.0536448	0.19565	9.78248
Barley	14.467	3.4631	0.717901		16.6119	5.77957	6.67493	2.49178	0.332238	1.33338		0.60229	0.988967	3.02981	1.86578	8.66609	0.0667493	0.200248	0.141823	0.332238	16.6119
Maize	342.11	10.2702	19.656		373.184	140.812	129.041	55.9776	7.46367	39.8888		7.84758	8.22867	57.6881	49.3935	174.05	1.29041	47.4107	0.154846	7.46367	373.184
Rye	0.458	2.1075	-0.011985		0.57572	0.182971	0.236038	0.086358	0.0115144	0.0588392		0.0448932	0.0180279	0.0659175	0.0984613	0.304693	0.00236038	0.00708113	0.0347565	0.0115144	0.57572
Oats	4.149	2.7671	0.117453		5.65777	1.65753	2.47126	0.848665	0.113155	0.567159		0.24083	0.112627	0.969986	0.763216	3.13458	0.0247126	0.0741379	0.107066	0.113155	5.65777
Millet	0.201	1.8769	0.0135168		0.276979	0.0849024	0.116928	0.0415468	0.00553957	0.0280614		0	0.0040925	0.0671616	0.0323445	0.149706	0.00116928	0.00350785	0	0.00553957	0.277038
Sorghum	9.728	4.3548	2.06554		11.7381	4.10911	4.40403	1.76071	0.234761	1.22946		0.22378	0.210611	1.50417	1.48059	5.83444	0.0440403	0.132121	0.0080256	0.234761	11.7381
Cereals, Other	0.489	3.63349	0.110403		0.608935	0.206847	0.235286	0.0913402	0.0121787	0.0632827		0.0214928	0.0134433	0.0423	0.0831116	0.30898	0.00235286	0.00705859	0.007614	0.0121787	0.608935
Starchy Roots	25.031	41.2495	0.08789		8.06083	2.75341	2.75341	1.20912	0.161217	1.18367		1.05914	0	0.03696	2.60536	3.8524	0.0275341	0.0826023	0.14773	0.161217	8.06083
Sugar Cane	27.607	78.0625	-1.43796		8.71744	3.57787	2.38524	1.30762	0.174349	1.27237		2.21207	0	0	2.82021	2.40483	0.0238524	2.2207	0.299404	0.174349	8.71744
Sugar Beet	27.676	58.1816	-0.891879		6.23075	2.55726	1.70484	0.934612	0.124615	0.909417		1.61693	2.49155	0.00162013	1.16907	1.71884	0	0	0	0.124615	6.23075
Pulses	7.534	1.9916	2.01602		9.22576	3.18688	3.18688	1.38386	0.184515	1.28362		0.517037	0	0.197964	1.5081	4.57075	0	0	0.231381	0.184515	9.22576
Treenuts	1.908	3.7622	0.32376		5.39194	1.08756	2.7189	0.808791	0.107839	0.668848		0.634909	0	0	0.797739	3.52769	0	0	0	0.107839	5.39194
Oilcrops	21.008	1.9814	2.45655		39.3009	10.0502	17.4715	5.89513	0.786018	5.09799		1.76883	0	3.50524	6.1403	23.3667	0	1.09861	0.178681	0.786018	39.3009
Soyabeans	94.924	2.9397	20.8439		127.919	42.9436	52.4866	19.1879	2.55839	10.7428		4.6075	13.2288	1.02876	12.2635	71.6746	0	0.633666	1.08038	2.55839	127.919
Vegetables	39.624	31.4284	-0.285366		4.4155	2.36952	0.592379	0.662325	0.0883099	0.702969		1.24591	0	0.011661	2.09933	1.2547	0	0	0.0009568	0.0883099	4.4155
Fruits	28.202	22.884	-1.35637		11.9547	2.41127	6.02818	1.7932	0.239093	1.48293		1.89342	0	0	3.35715	7.82138	0	0	0	0.239093	11.9547
Cotton	2.68202	0.8734	0		5.57955	1.23105	2.87244	0.836933	0.111591	0.527538		0	0	0	0.57678	3.70938	1.09662	0	0.0851829	0.111591	5.57955
Forage crops	1041.21	22.635	0		318.129	124.924	0	127.251	65.9535	0		0	124.924	0	0	127.251			0	65.9535	318.129
Other	10.9465	4.85681	0		3.9289	1.31335	1.59751	0.589334	0.0785779	0.350126		0.498719	0.163608	0.25635	0	2.0191	0.0159751	0.0479253	0.0908779	0.0785779	3.17114
TOTAL	741.662		64.4375		1071.52	388.89	283.025	240.26	81.0213	77.9721		32.0074	153.176	71.4689	105.146	503.44	3.05626	53.2998	3.70821	81.0213	1070.76
			North America			Livestock system inputs and outputs
Livestock feed				NPP sinks						Livestock system outcomes			Manure uses			Final outcomes
	total available in DM	total used in DM	Underground. NPP ratio	Total NPP	NPP remaining on land	NPP used	Relative digestibility			Food	Manure	Respiration	Fuel, material	Soil	Waste	Total meat	Losses of meat	Total soil	Fuel, material	Respiration	Other ecosystem serv.	Manure losses	TOTAL
Source	[8]	[8]	ass.	calculated			[8]			calculated			ass.	[12]	[12]	calculated
Unit	TgC	TgC		TgC												TgC
Grazing	1333	911	0.5	1279.68	842.4	437.28	0.289863			0.016987	0.388567	0.594446	0	1	0	5.39681	2.03127	169.913	0	259.939	842.4	0	1279.68
Forrage	see crops table					124.924	0.368362			0.0215874	0.483041	0.495371	0.01	0.634812	0.345188	1.95932	0.737455	38.3066	0.603433	61.8836	0	20.8298	124.32
Feed						71.4689	1			0.0586037	0.446025	0.495371	0.01	0.634812	0.345188	3.043	1.14534	20.2359	0.318769	35.4037	0	11.0035	71.1502
Residuals						28.2525	0.289863			0.0215874	0.483041	0.495371	0.01	0.634812	0.345188	0.443115	0.166781	8.66335	0.136471	13.9955	0	4.71082	28.116
TOTAL						661.925										10.8422	4.08085	237.119	1.05867	371.222	842.4	36.5441	1503.27
Livestock products										Food demand incr. to 2050	Demand under meat reduction scenario
	Livestock production	Livestock production in C	Agricultural wastage	Food wastage	Net trade - exports	Total meat
Source	[11]	calculated	[6]	[6]	[11]					[13]	[14]
Unit	TgC	TgC			TgC	TgC				%	TgC
Pig meat	12.3852	2.27398	0.088	0.15	0.35616	1.46138				1.47404	0.422701
Beef and Buffalo Meat + (Total)	13.1431	2.41313	0.088	0.15	-0.0277963	1.85998				1.47404	0.466335
Eggs Primary + (Total)	5.77153	1.2447	0.088	0.15	0.026159	0.928529				1.47404	0.640734
Milk,Total + (Total)	93.078	6.62749	0.052	0.155	0.0566333	5.21069				1.42718	7.03077
Poultry Meat + (Total)	20.1639	3.70218	0.088	0.15	0.629769	2.34117				1.47404	1.57913
Sheep and Goat Meat + (Total)	0.097095	0.0178271	0.088	0.15	-0.0160749	0.0258333				1.47404	0.0403017
TOTAL	144.639	16.2793			1.02485	11.8276					10.18
References
[1]	Scarlat et al. (2010)
[2]	Haberl et al. (2007)
[3]	Roy et al. (2001)
[4]	Oerke and Dehne (1997)
[5]	Faostat (2013) Food Balance Sheets
[6]	Gustavsson (2012)
[7]	Biofuels platform (2012)
[8]	Wirsenius (2000)
[9]	after Smil (1999)
[10]	McCarthy et al. 2009
[11]	Faostat (2013) production
[12]	Conant et al. 2013
[13]	Alexandratos & Bruinsma (2012)
[14]	Willet (2001)

## Sheet: Oceania
			Oceania			Biomass flows									Confidence colour coding:				Good > Lower > Lowest
Crops	Plant growth uses					Harvest uses							Residue uses					Processing outcomes				Food
	Harvest	Residue (ag)	Residue (bg)	Other plants	Losses	Food	Seeds	Processing	Feed	Loss	Other	Biofuel	Feed	Fibre	Energy	Soil	Waste (burn)	Food	Feed	Energy	Loss	Waste
Notation	ph	pr	pbr	po	ploss	hd	hs	hp	hl	hloss	ho	hb	rl	rfib	ren	rs	rw	pf	pl	pe	pw	fw
Source	[1], [2]	[1]		ass.	[4]	[5]	[5]	[5]	[5]	[5], [6]	[5]	[7]	[8]	[9]	[9]	remainder	[10]	[5], [8]	[5], [8]	assumed	[5], [6]	[6]
Wheat	0.272579	0.391579	0.15	0.05	0.135842	0.0675906	0.111439	0.429747	0.351223	0.04	0	0	0.035	0.01	0.03	0.895	0.03	0.73	0.1377	0	0.1323	0.29
Rice	0.201842	0.336697	0.15	0.05	0.261461	0.95315	0.00442478	0.00242532	0	0.04	0	0	0	0.01	0.03	0.76	0.2	0.69	0.124	0	0.186	0.29
Barley	0.284419	0.393496	0.15	0.05	0.122085	0.00027989	0.0446219	0.299786	0.615312	0.04	0	0	0.035	0.01	0.03	0.925	0	0.5	0.45	0	0.05	0.29
Maize	0.319435	0.31561	0.15	0.05	0.164955	0.0359556	0.0015083	0.216654	0.705882	0.04	0	0	0.045	0.01	0.03	0.915	0	0.69	0.155	0.062	0.093	0.29
Rye	0.240508	0.404793	0.15	0.05	0.154699	0.105431	0.230769	0.6238	0	0.04	0	0	0.035	0.01	0.03	0.925	0	0.69	0.1302	0	0.1798	0.29
Oats	0.271488	0.369787	0.15	0.05	0.158724	0.00702703	0.0401046	0.00702703	0.905841	0.04	0	0	0.035	0.01	0.03	0.925	0	0.69	0.1302	0	0.1798	0.29
Millet	0.245639	0.398995	0.15	0.05	0.155366	0	0	0	0.967742	0.04	0	0	0.035	0.01	0.03	0.925	0	0.69	0.1302	0	0.1798	0.29
Sorghum	0.296733	0.341263	0.15	0.05	0.162005	0	0.00263356	0	0.956674	0.04	0	0	0.035	0.01	0.03	0.925	0	0.69	0.1302	0	0.1798	0.29
Cereals, Other	0.277166	0.363372	0.15	0.05	0.159462	0.00169506	0.0293103	0.0100291	0.918966	0.04	0	0	0.035	0.01	0.03	0.925	0	0.69	0.1302	0	0.1798	0.29
Starchy Roots	0.282609	0.282609	0.15	0.05	0.234783	0.557269	0.0602062	0.0429371	0.0395876	0.3	0	0	0	0.01	0.03	0.96	0	0.69	0	0	0.31	0.37
Sugar Cane	0.343085	0.228723	0.15	0.05	0.228191	6.14742e-05	0	0.999908	0	3.07371e-05	0	0	0	0.01	0.03	0.46	0.5	0.546715	0	0.407957	0.0453285	0.05
Sugar Beet	0.343085	0.228723	0.15	0.05	0.228191	0	0	0	0	0	0	0	0.54	0	0	0.46	0	0.546715	0.407957	0	0.0453285	0.05
Pulses	0.290541	0.290541	0.15	0.05	0.218919	0.00187472	0.102697	0.0110921	0.759336	0.125	0	0	0	0	0	1	0	0.9	0	0	0.1	0.05
Treenuts	0.172	0.43	0.15	0.05	0.198	0.875	0	0	0	0.125	0	0	0	0	0	1	0	0.9	0.049	0	0.051	0.05
Oilcrops	0.199343	0.397831	0.15	0.05	0.202825	0.146456	0.00604458	0.76808	0.00682391	0.071439	0	0	0	0	0	1	0	0.302663	0.627603	0	0.0697337	0.05
Soyabeans	0.30091	0.367779	0.15	0.05	0.131311	0.0594298	0.0111111	0.693348	0.111111	0.125	0	0	0	0	0	1	0	0.213465	0.786535	0	0	0.05
Vegetables	0.443299	0.110825	0.15	0.05	0.245876	0.0983133	0	0.581687	0	0.32	0	0	0	0	0	1	0	0.9	0	0	0.1	0.24
Fruits	0.172	0.43	0.15	0.05	0.198	0.337214	0	0.341961	0.000824912	0.32	0	0	0	0	0	1	0	0.9	0	0	0.1	0.24
Cotton	0.195351	0.455818	0.15	0.05	0.148831	0	0.111439	0	0	0.04	0.848561	0	0	0	0	1	0	0.9	0	0	0.1	0
Forage crops	0.392683	0	0.4	0.207317	0	0	0	0	1	0	0	0	na	na	na	na	na	na	na	na	na	na
Other Crops	0.272579	0.391579	0.15	0.05	0.135842	0.0675906	0.111439	0.429747	0.351223	0.04	0	0	0.035	0.01	0.03	0.895	0.03	0.73	0.1377	0	0.1323	0.29
	Statistical data inputs				Calculated growth distribution in Carbon							Final outcomes
	Production	Av. Yields	Net trade - Exports		Real NPP	Harvest	Residue (above ground)	Residue (below ground)	Other plants	Losses and weeds		Food	Fodder	Feed	Losses	Soil	Fibre	Energy	Seed	Other ecosys. service	TOTAL
Source	[5]	[11]	[5]		calculated							calculated
Unit	TgC	t/ha	TgC		TgC							TgC
Wheat	22.059	1.5937	6.37842		32.3303	8.81257	12.6599	4.84954	1.61651	4.39182		0.658992	0.587139	0.85493	5.27654	16.1801	0.126599	0.379796	0.271261	1.61651	32.3303
Rice	0.054	5.9072	-0.168115		0.113007	0.0228096	0.0380492	0.0169511	0.00565036	0.029547		0.129433	5.74186e-05	0	0.0977468	0.0458685	0.000380492	0.00114148	0.0008448	0.00565036	0.113007
Barley	8.344	1.8446	1.63236		11.7201	3.33343	4.61183	1.75802	0.586007	1.43086		0.181373	0.390895	1.04669	1.59848	6.02397	0.0461183	0.138355	0.075905	0.586007	11.7201
Maize	0.617	6.9094	-0.0189336		0.795021	0.253957	0.250917	0.119253	0.039751	0.131142		0.0359308	0.0204553	0.192629	0.162232	0.348842	0.00250917	0.0111931	0.0004116	0.039751	0.795021
Rye	0.035	0.5703	0.008789		0.0581373	0.0139825	0.0235335	0.00872059	0.00290686	0.00899377		0.0019759	0.00124548	0	0.0105911	0.0304891	0.000235335	0.000706006	0.0011985	0.00290686	0.0581373
Oats	1.214	1.3912	0.0267665		1.78642	0.484993	0.660596	0.267963	0.0893211	0.283549		0.00386364	0.0235401	0.415081	0.304035	0.879015	0.00660596	0.0198179	0.018377	0.0893211	1.78642
Millet	0.038	0.95	0.0029568		0.0653446	0.0160512	0.0260722	0.00980169	0.00326723	0.0101523		0	0.000912527	0.012672	0.0106761	0.0339185	0.000260722	0.000782166	0	0.00326723	0.065446
Sorghum	2.692	3.5097	0.0143616		3.83207	1.1371	1.30774	0.574811	0.191604	0.620814		0	0.045771	1.0741	0.665724	1.78447	0.0130774	0.0392323	0.0029568	0.191604	3.8313
Cereals, Other	0.564	2.25239	-0.006768		0.860756	0.238572	0.312775	0.129113	0.0430378	0.137258		0.00150068	0.0112675	0.225459	0.148127	0.41843	0.00312775	0.00938324	0.007191	0.0430378	0.860756
Starchy Roots	2.192	12.8587	-0.02563		0.853194	0.24112	0.24112	0.127979	0.0426597	0.200315		0.0986293	0	0.01056	0.341816	0.359454	0.0024112	0.0072336	0.01606	0.0426597	0.853194
Sugar Cane	32.534	72.8641	-0.00912		12.2897	4.21641	2.81094	1.84345	0.614484	2.8044		2.1947	0	0	4.51703	3.13648	0.0281094	1.808	0	0.614484	12.2897
Sugar Beet	0	0	0		0	0	0	0	0	0		0	0	0	0	0	0	0	0	0	0
Pulses	1.836	1.2524	0.368856		2.67305	0.776628	0.776628	0.400957	0.133652	0.58518		0.00459344	0	0.309636	0.636846	1.17758	0	0	0.041877	0.133652	2.67305
Treenuts	0.069	1.2913	-0.03363		0.228663	0.03933	0.098325	0.0342994	0.0114331	0.0452752		0.060648	0	0	0.0575872	0.132624	0	0	0	0.0114331	0.228663
Oilcrops	3.79	1.1214	0.508807		9.09555	1.81314	3.6185	1.36433	0.454777	1.84481		0.469531	0	0.637651	2.03256	4.98283	0	0	0.00788412	0.454777	9.09404
Soyabeans	0.08	1.8925	-0.0364578		0.120275	0.036192	0.0442347	0.0180413	0.00601376	0.0157934		0.0143166	0.039619	0.0080722	0.0256282	0.0622759	0	0	0.00080722	0.00601376	0.120275
Vegetables	2.937	22.3894	-0.0017342		0.396194	0.175633	0.0439081	0.0594292	0.0198097	0.0974148		0.0838221	0	0	0.19096	0.103337	0	0	0	0.0198097	0.396194
Fruits	4.78	11.2725	-0.0058995		2.3761	0.40869	1.02173	0.356416	0.118805	0.470469		0.203225	0	0.000342	0.681491	1.37814	0	0	0	0.118805	2.3761
Cotton	0.332119	1.9513	0		0.780353	0.152443	0.355699	0.117053	0.0390177	0.116141		0	0	0	0.122238	0.472752	0.129357	0	0.0169881	0.0390177	0.780353
Forage crops	249.644	28.0621	0		76.2755	29.9521	0	30.5102	15.8132	0		0	29.9521	0	0	30.5102			0	15.8132	76.2755
Other	0	0	0		0	0	0	0	0	0		0	0	0	0	0	0	0	0	0	0
TOTAL	84.1671		8.63502		156.65	52.1251	28.9024	42.5664	19.8319	13.2239		4.14253	31.073	4.78782	16.8803	68.0608	0.358791	2.41564	0.461762	19.8319	156.648
			Oceania			Livestock system inputs and outputs
Livestock feed				NPP sinks						Livestock system outcomes			Manure uses			Final outcomes
	total available in DM	total used in DM	Undergrou. NPP ratio	Total NPP	NPP remaining on land	NPP used	Relative digestability			Food	Manure	Respiration	Fuel, material	Soil	Waste	Total meat	Losses of meat	Total soil	Fuel, material	Respiration	Other ecosystem serv.	Manure losses	TOTAL
Source	[8]	[8]	ass.	calcualted			[8]			calculated			ass.	[12]	[12]	calculated
Unit	TgC	TgC		TgC												TgC
Grazing	781.346	533.988	0.5	750.092	493.778	256.314	0.289863			0.00893166	0.19668	0.794388	0	1	0	0.755877	1.53343	50.4119	0	203.613	493.778	0	750.092
Forrage	see crops table					29.9521	0.368362			0.0113505	0.326659	0.66199	0.01	0.0281739	0.951826	0.11225	0.22772	0.275657	0.0978413	19.828	0	9.31279	29.8543
Feed						4.78782	1			0.0308134	0.307196	0.66199	0.01	0.0281739	0.951826	0.0487106	0.0988184	0.0414382	0.014708	3.16949	0	1.39995	4.77311
Residuals						1.1209	0.289863			0.0113505	0.326659	0.66199	0.01	0.0281739	0.951826	0.00420076	0.00852201	0.010316	0.00366153	0.742026	0	0.348514	1.11724
TOTAL						292.175										0.921039	1.8685	50.7393	0.116211	227.353	493.778	11.0613	785.837
Livestock products										Food demand incr. to 2050	Demand under meat reduction scenario
	Livestock production	Livestock production in C	Agricultural wastage	Food wastage	Net trade - exports	Total meat
Source	[11]	calculated	[6]	[6]	[11]					[13]	[14]
Unit	TgC	TgC			TgC	TgC				%	TgC
Pig meat	0.462137	0.0848505	0.088	0.15	-0.0353314	0.0915786				1.87293	0.0538786
Beef and Buffalo Meat + (Total)	2.78096	0.510596	0.088	0.15	0.298056	0.161955				1.87293	0.0594403
Eggs Primary + (Total)	0.23181	0.0499927	0.088	0.15	-0.000196684	0.0382443				1.87293	0.0592394
Milk,Total + (Total)	24.489	1.7437	0.052	0.155	1.22292	0.412986				1.81339	0.474342
Poultry Meat + (Total)	1.03225	0.189526	0.088	0.15	0	0.144419				1.87293	0.22371
Sheep and Goat Meat + (Total)	1.14022	0.209349	0.088	0.15	0.115706	0.0713558				1.87293	0.0968242
TOTAL	30.1364	2.78802			1.60115	0.920538					0.967434
References
[1]	Scarlat et al. (2010)
[2]	Haberl et al. (2007)
[3]	Roy et al. (2001)
[4]	Oerke and Dehne (1997)
[5]	Faostat (2013) Food Balance Sheets
[6]	Gustavsson (2012)
[7]	Biofuels platform (2012)
[8]	Wirsenius (2000)
[9]	after Smil (1999)
[10]	assumed
[11]	Faostat (2013) production
[12]	Conant et al. 2013
[13]	Alexandratos & Bruinsma (2012)
[14]	Willet (2001)

## Sheet: SAsia
			South Asia			Biomass flows									Confidence colour coding:				Good > Lower > Lowest
Crops	Plant growth uses					Harvest uses							Residue uses					Processing outcomes				Food
	Harvest	Residue (ag)	Residue (bg)	Other plants	Losses	Food	Seeds	Processing	Feed	Loss	Other	Biofuel	Feed	Fibre	Energy	Soil	Waste (burn)	Food	Feed	Energy	Loss	Waste
Notation	ph	pr	pbr	po	ploss	hd	hs	hp	hl	hloss	ho	hb	rl	rfib	ren	rs	rw	pf	pl	pe	pw	fw
Source	[1], [2]	[1]		ass.	[4]	[5]	[5]	[5]	[5]	[5], [6]	[5]	[7]	[8]	[9]	[9]	remainder	[10]	[5], [8]	[5], [8]	assumed	[5], [6]	[6]
Wheat	0.305377	0.381804	0.15	0.02	0.14282	0.114898	0.0438145	0.679826	0.0314614	0.13	0	0	0.72	0.01	0.03	0.025	0.215	0.73	0.1377	0	0.1323	0.05
Rice	0.171026	0.397698	0.15	0.02	0.261276	0.812844	0.022674	0.00244655	0.0320355	0.13	0	0	0.72	0.01	0.03	0.0175	0.2225	0.69	0.124	0	0.186	0.05
Barley	0.300451	0.402912	0.15	0.02	0.126638	0.0191214	0.0361596	0.124413	0.690305	0.13	0	0	0.72	0.01	0.03	0.035	0.205	0.5	0.45	0	0.05	0.05
Maize	0.303574	0.359634	0.15	0.02	0.166792	0.0632493	0.0354854	0.374864	0.396401	0.13	0	0	0.72	0.01	0.03	0.01	0.23	0.69	0.155	0.062	0.093	0.05
Rye	0.329894	0.329894	0.15	0.02	0.170212	0	0	0	0	0.13	0	0	0.72	0.01	0.03	0.035	0.205	0.69	0.1302	0	0.1798	0.05
Oats	0.288933	0.376177	0.15	0.02	0.16489	0.238571	0	0.238571	0.392857	0.13	0	0	0.72	0.01	0.03	0.035	0.205	0.69	0.1302	0	0.1798	0.05
Millet	0.249355	0.420899	0.15	0.02	0.159747	0.399795	0.0385529	0.399795	0.0318575	0.13	0	0	0.72	0.01	0.03	0.035	0.205	0.69	0.1302	0	0.1798	0.05
Sorghum	0.255158	0.414341	0.15	0.02	0.160501	0.119291	0.0319771	0.705805	0.0129269	0.13	0	0	0.72	0.01	0.03	0.035	0.205	0.69	0.1302	0	0.1798	0.05
Cereals, Other	0.273058	0.394115	0.15	0.02	0.162827	0	0	0	0.87	0.13	0	0	0.72	0.01	0.03	0.035	0.205	0.69	0.1302	0	0.1798	0.05
Starchy Roots	0.293696	0.293696	0.15	0.02	0.242609	0.685148	0.0635294	0	0.00132217	0.25	0	0	0.56	0.01	0.03	0.195	0.205	0.69	0	0	0.31	0.14
Sugar Cane	0.356489	0.23766	0.15	0.02	0.235851	0.0546435	0.0565674	0.859714	0.0162235	0.0128513	0	0	0.72	0.01	0.03	0.07	0.17	0.335165	0	0.598351	0.0664835	0.03
Sugar Beet	0.356489	0.23766	0.15	0.02	0.235851	0	0	1	0	0	0	0	0.135	0	0	0.66	0.205	0.335165	0.598351	0	0.0664835	0.03
Pulses	0.301892	0.301892	0.15	0.02	0.226216	0.100088	0.0399288	0.592185	0.0777981	0.19	0	0	0.56	0	0	0.235	0.205	0.9	0	0	0.1	0.03
Treenuts	0.17872	0.4468	0.15	0.02	0.20448	0.81	0	0	0	0.19	0	0	0.56	0	0	0.235	0.205	0.9	0.049	0	0.051	0.03
Oilcrops	0.20779	0.412601	0.15	0.02	0.20961	0.1859	0.0208333	0.560108	0.0743376	0.168702	0	0	0.56	0	0	0.235	0.205	0.619743	0.342231	0	0.0380257	0.03
Soyabeans	0.312448	0.381881	0.15	0.02	0.135671	0.119108	0.0538536	0.636942	9.63391e-05	0.19	0	0	0.72	0	0	0.11	0.17	0.259846	0.740154	0	0	0.03
Vegetables	0.460619	0.115155	0.15	0.02	0.254227	0.109869	7.49975e-05	0.650056	0	0.24	0	0	0.56	0	0	0.235	0.205	0.9	0	0	0.1	0.17
Fruits	0.17872	0.4468	0.15	0.02	0.20448	0.605185	0	0.154815	0	0.24	0	0	0	0	0	0.795	0.205	0.9	0	0	0.1	0.17
Cotton	0.202887	0.473404	0.15	0.02	0.153709	0	0.0438145	0	0	0.13	0.826186	0	0	0	0	0.795	0.205	0.9	0	0	0.1	0
Forage crops	0.392584	0	0.4	0.207416	0	0	0	0	1	0	0	0	na	na	na	na	na	na	na	na	na	na
Other Crops	0.305377	0.381804	0.15	0.02	0.14282	0.114898	0.0438145	0.679826	0.0314614	0.13	0	0	0.72	0.01	0.03	0.025	0.215	0.73	0.1377	0	0.1323	0.05
	Statistical data inputs				Calculated growth distribution in Carbon							Final outcomes
	Production	Av. Yields	Net trade - Exports		Real NPP	Harvest	Residue (above ground)	Residue (below ground)	Other plants	Losses and weeds		Food	Fodder	Feed	Losses	Soil	Fibre	Energy	Seed	Other ecosys. service	TOTAL
Source	[5]	[11]	[5]		calculated							calculated
Unit	TgC	t/ha	TgC		TgC							TgC
Wheat	120.39	2.6629	1.13818		157.497	48.0958	60.1327	23.6245	3.14993	22.4936		27.2642	47.6914	1.47735	47.185	25.1278	0.601327	1.80398	2.05742	3.14993	157.497
Rice	134.852	3.4553	1.68833		333.058	56.9615	132.456	49.9586	6.66115	87.0199		42.7707	95.3854	1.7707	125.953	52.2766	1.32456	3.97369	1.25326	6.66115	333.058
Barley	5.241	2.0737	-0.469412		6.9688	2.09378	2.80781	1.04532	0.139376	0.882515		0.198037	2.16513	1.76939	1.8177	1.14359	0.0280781	0.0842343	0.092684	0.139376	6.9688
Maize	24.387	2.3272	-0.621928		33.0651	10.0377	11.8913	4.95976	0.661302	5.51499		3.25982	9.18113	4.22549	10.1789	5.07868	0.118913	0.604486	0.37826	0.661302	33.0651
Rye	0	0	0		0	0	0	0	0	0		0	0	0	0	0	0	0	0	0	0
Oats	0	1.0094	-0.011186		0	0	0	0	0	0		0.00428453	0.00034746	0.0043945	0.00215951	0	0	0	0	0	0
Millet	9.424	0.7972	0.0692736		15.964	3.9807	6.71922	2.3946	0.31928	2.55019		2.51063	5.04144	0.124608	4.84942	2.62977	0.0671922	0.201577	0.150797	0.31928	15.964
Sorghum	7.405	0.9512	0.0236544		12.2585	3.12787	5.07921	1.83878	0.245171	1.96751		1.78797	3.9423	0.040128	3.90033	2.01655	0.0507921	0.152376	0.099264	0.245171	12.2585
Cereals, Other	0	1.56424	0		0	0	0	0	0	0		0	0	0	0	0	0	0	0	0	0
Starchy Roots	61.165	18.8676	-0.01078		22.9086	6.72815	6.72815	3.43629	0.458172	5.55782		3.97076	3.76776	0.00891	9.26823	4.74828	0.0672815	0.201845	0.42812	0.458172	22.9086
Sugar Cane	346.404	60.7269	-2.50493		125.934	44.894	29.9293	18.89	2.51867	29.7016		15.7604	21.5491	0.768976	38.5953	20.9851	0.299293	25.2804	2.68123	2.51867	125.934
Sugar Beet	2.109	35.6102	-0.00302924		0.546641	0.194872	0.129914	0.0819961	0.0109328	0.128926		0.0643396	0.135953	0	0.170705	0.16774	0	0	0	0.0109328	0.546641
Pulses	16.228	0.6716	-2.1721		22.7381	6.86444	6.86444	3.41071	0.454762	5.14372		5.54901	3.84409	0.703026	8.97463	5.02386	0	0	0.360819	0.454762	22.7381
Treenuts	2.237	1.3981	-0.29412		7.13457	1.27509	3.18773	1.07019	0.142691	1.45888		1.23293	1.78513	0	2.44864	1.8193	0	0	0	0.142691	7.13457
Oilcrops	41.284	1.1466	-3.41841		95.0494	19.7503	39.2174	14.2574	1.90099	19.9233		11.979	21.9618	6.16343	32.7354	23.4735	0	0	0.482681	1.90099	95.2783
Soyabeans	10.342	1.0376	-0.932586		14.9744	4.67872	5.71844	2.24616	0.299488	2.0316		1.54915	6.76264	0.000540588	4.11779	2.87519	0	0	0.302189	0.299488	14.9744
Vegetables	121.169	13.8961	0.069667		15.7308	7.24591	1.81148	2.35962	0.314616	3.9992		4.13913	1.01443	0	7.40712	2.78532	0	0	0.0005382	0.314616	15.7308
Fruits	94.78	10.6531	0.033516		45.3429	8.10369	20.2592	6.80144	0.906859	9.27172		4.98697	0	0	16.5081	22.9075	0	0	0	0.906859	45.3429
Cotton	9.39938	0.6294	0		21.2646	4.31431	10.0667	3.18969	0.425291	3.26855		0	0	0	5.89309	11.1927	3.56442	0	0.189029	0.425291	21.2646
Forage crops	712.708	28.0049	0		217.814	85.51	0	87.1254	45.1781	0		0	85.51	0	0	87.1254			0	45.1781	217.814
Other	0	0	0		0	0	0	0	0	0		0	0	0	0	0	0	0	0	0	0
TOTAL	1006.82		-7.41588		1148.25	313.857	343	226.691	63.7868	200.914		127.027	309.738	17.0569	320.006	271.377	6.12186	32.3026	8.4763	63.7868	1148.48
			South Asia			Livestock system inputs and outputs
Livestock feed				NPP sinks						Livestock system outcomes			Manure uses			Final outcomes
	total available in DM	total used in DM	Undergrou. NPP ratio	Total NPP	NPP remaining on land	NPP used	Relative digestability			Food	Manure	Respiration	Fuel, material	Soil	Waste	Total meat	Losses of meat	Total soil	Fuel, material	Respiration	Other ecosystem serv.	Manure losses	TOTAL
Source	[8]	[8]	ass.	calcualted			[8]			calculated			ass.	[12]	[12]	calculated
Unit	TgC	TgC		TgC												TgC
Grazing	171.934	79.8645	0.5	165.057	126.722	38.335	0.289863			0.0276767	0.286662	0.685658	0	1	0	0.82224	0.238748	10.9892	0	26.2847	126.722	0	165.056
Forrage	see crops table					85.51	0.368362			0.035172	0.393444	0.57138	0.01	0.310694	0.669306	2.33079	0.676774	10.4528	0.336434	48.8587	0	22.5177	85.1732
Feed						17.0569	1			0.0954822	0.333133	0.571373	0.01	0.310694	0.669306	1.26215	0.366482	1.76544	0.0568223	9.74586	0	3.80315	16.9999
Residuals						224.228	0.289863			0.035172	0.393444	0.57138	0.01	0.310694	0.669306	6.11188	1.77466	27.4098	0.882211	128.119	0	59.0469	223.345
TOTAL						365.13										10.5271	3.05667	50.6172	1.27547	213.009	126.722	85.3677	490.574
Livestock products										Food demand incr. to 2050	Demand under meat reduction scenario
	Livestock production	Livestock production in C	Agricultural wastage	Food wastage	Net trade - exports	Total meat
Source	[11]	calculated	[6]	[6]	[11]					[13]	[14]
Unit	TgC	TgC			TgC	TgC				%	TgC
Pig meat	0.36957	0.0690664	0.104	0.11	0.000502342	0.0538914				5.33957	0.291696
Beef and Buffalo Meat + (Total)	4.77545	0.892451	0.104	0.11	0.0766909	0.641187				5.33957	3.43559
Eggs Primary + (Total)	4.8252	1.0592	0.104	0.11	0.0147513	0.820934				5.33957	4.43994
Milk,Total + (Total)	135.137	10.3072	0.115	0.11	-0.0556883	8.03125				2.18884	17.8763
Poultry Meat + (Total)	5.12107	0.957041	0.104	0.11	0.000167447	0.752103				5.33957	4.07348
Sheep and Goat Meat + (Total)	1.90763	0.356504	0.104	0.11	0.00987939	0.272447				5.33957	1.47104
TOTAL	152.136	13.6415			0.046303	10.5718					31.588
References
[1]	Scarlat et al. (2010)
[2]	Haberl et al. (2007)
[3]	Roy et al. (2001)
[4]	Oerke and Dehne (1997)
[5]	Faostat (2013) Food Balance Sheets
[6]	Gustavsson (2012)
[7]	Biofuels platform (2012)
[8]	Wirsenius (2000)
[9]	after Smil (1999)
[10]	Streets et al. 2003
[11]	Faostat (2013) production
[12]	Conant et al. 2013
[13]	Alexandratos & Bruinsma (2012)
[14]	Willet (2001)

## Sheet: SEAsia
			SE Asia			Biomass flows									Confidence colour coding:				Good > Lower > Lowest
Crops	Plant growth uses					Harvest uses							Residue uses					Processing outcomes				Food
	Harvest	Residue (ag)	Residue (bg)	Other plants	Losses	Food	Seeds	Processing	Feed	Loss	Other	Biofuel	Feed	Fibre	Energy	Soil	Waste (burn)	Food	Feed	Energy	Loss	Waste
Notation	ph	pr	pbr	po	ploss	hd	hs	hp	hl	hloss	ho	hb	rl	rfib	ren	rs	rw	pf	pl	pe	pw	fw
Source	[1], [2]	[1]		ass.	[4]	[5]	[5]	[5]	[5]	[5], [6]	[5]	[7]	[8]	[9]	[9]	remainder	[10]	[5], [8]	[5], [8]	assumed	[5], [6]	[6]
Wheat	0.276318	0.387425	0.15	0.05	0.136258	0.118176	0.000473634	0.703987	0.0473634	0.13	0	0	0.24	0.01	0.03	0.5738	0.1462	0.73	0.1377	0	0.1323	0.05
Rice	0.174785	0.369896	0.15	0.05	0.255319	0.771322	0.0225918	0.00644001	0.0696466	0.13	0	0	0.24	0.01	0.03	0.5687	0.1513	0.69	0.124	0	0.186	0.05
Barley	0.283317	0.394706	0.15	0.05	0.121976	0.00405417	0	0.860421	0.00552486	0.13	0	0	0.24	0.01	0.03	0.5806	0.1394	0.5	0.45	0	0.05	0.05
Maize	0.299853	0.337737	0.15	0.05	0.16241	0.059507	0.00708793	0.356891	0.446514	0.13	0	0	0.27	0.01	0.03	0.5336	0.1564	0.69	0.155	0.062	0.093	0.05
Rye	0.268144	0.373567	0.15	0.05	0.15829	0	0	0	0	0	0	0	0.24	0.01	0.03	0.5806	0.1394	0.69	0.1302	0	0.1798	0.05
Oats	0.267197	0.374636	0.15	0.05	0.158167	0.397963	0	0.397963	0.0740741	0.13	0	0	0.24	0.01	0.03	0.5806	0.1394	0.69	0.1302	0	0.1798	0.05
Millet	0.243578	0.401324	0.15	0.05	0.155098	0.34034	0.0194175	0.34034	0.169903	0.13	0	0	0.24	0.01	0.03	0.5806	0.1394	0.69	0.1302	0	0.1798	0.05
Sorghum	0.249262	0.394901	0.15	0.05	0.155836	0	0	0	0.87	0.13	0	0	0.24	0.01	0.03	0.5806	0.1394	0.69	0.1302	0	0.1798	0.05
Cereals, Other	0.25812	0.384893	0.15	0.05	0.156987	0.0608704	0.00556586	0.36015	0.443414	0.13	0	0	0.24	0.01	0.03	0.5806	0.1394	0.69	0.1302	0	0.1798	0.05
Starchy Roots	0.282609	0.282609	0.15	0.05	0.234783	0.584363	0.00614377	0.000402362	0.159091	0.25	0	0	0.28	0.01	0.03	0.5406	0.1394	0.69	0	0	0.31	0.14
Sugar Cane	0.343085	0.228723	0.15	0.05	0.228191	0.0139337	0.0098838	0.918399	0.0189489	0.0388344	0	0	0.36	0.01	0.03	0.4844	0.1156	0.362142	0	0.574073	0.0637858	0.03
Sugar Beet	0.343085	0.228723	0.15	0.05	0.228191	0	0	0	0	0	0	0	0.135	0	0	0.7256	0.1394	0.362142	0.574073	0	0.0637858	0.03
Pulses	0.290541	0.290541	0.15	0.05	0.218919	0.0774261	0.0463153	0.458104	0.228154	0.19	0	0	0.175	0	0	0.6856	0.1394	0.9	0	0	0.1	0.03
Treenuts	0.172	0.43	0.15	0.05	0.198	0.81	0	0	0	0.19	0	0	0.28	0	0	0.5806	0.1394	0.9	0.049	0	0.051	0.03
Oilcrops	0.290541	0.290541	0.15	0.05	0.218919	0.209287	0.00501271	0.703083	0.00313191	0.0789129	0	0	0.175	0	0	0.6856	0.1394	0.208699	0.342	0.291301	0.158	0.03
Soyabeans	0.30091	0.367779	0.15	0.05	0.131311	0.124799	0.0144509	0.67075	0	0.19	0	0	0.2	0	0	0.6844	0.1156	0.222378	0.777622	0	0	0.03
Vegetables	0.443299	0.110825	0.15	0.05	0.245876	0.109859	0	0.649999	0.000141743	0.24	0	0	0.175	0	0	0.6856	0.1394	0.9	0	0	0.1	0.17
Fruits	0.172	0.43	0.15	0.05	0.198	0.589255	0	0.152355	0.0183904	0.24	0	0	0	0	0	0.8606	0.1394	0.9	0	0	0.1	0.17
Cotton	0.195351	0.455818	0.15	0.05	0.148831	0	0.000473634	0	0	0.13	0.869526	0	0	0	0	0.8606	0.1394	0.9	0	0	0.1	0
Forage crops	0.467463	0	0.4	0.132537	0	0	0	0	1	0	0	0	na	na	na	na	na	na	na	na	na	na
Other Crops	0.276318	0.387425	0.15	0.05	0.136258	0.118176	0.000473634	0.703987	0.0473634	0.13	0	0	0.24	0.01	0.03	0.5738	0.1462	0.73	0.1377	0	0.1323	0.05
	Statistical data inputs				Calculated growth distribution in Carbon							Final outcomes
	Production	Av. Yields	Net trade - Exports		Real NPP	Harvest	Residue (above ground)	Residue (below ground)	Other plants	Losses and weeds		Food	Fodder	Feed	Losses	Soil	Fibre	Energy	Seed	Other ecosys. service	TOTAL
Source	[5]	[11]	[5]		calculated							calculated
Unit	TgC	t/ha	TgC		TgC							TgC
Wheat	0.18	1.7525	-4.98896		0.260244	0.07191	0.100825	0.0390366	0.0130122	0.0354602		3.03896	0.514793	0.2397	1.33941	0.0968898	0.00100825	0.00302474	0.002397	0.0130122	0.260244
Rice	131.881	4.098	6.04708		318.715	55.7065	117.891	47.8072	15.9357	81.374		36.5979	28.3336	3.45861	107.652	114.852	1.17891	3.53674	1.12189	15.9357	318.715
Barley	0.019	1.7962	-0.426266		0.0267915	0.0075905	0.0105748	0.00401873	0.00133958	0.00326793		0.178988	0.170523	0.002397	0.0892289	0.0101584	0.000105748	0.000317243	0	0.00133958	0.0267915
Maize	37.106	3.7468	-0.464285		50.9345	15.2728	17.2025	7.64017	2.54672	8.27228		4.57122	5.51522	7.02684	13.7715	16.8194	0.172025	0.864293	0.111544	2.54672	50.9345
Rye	0	0	-0.0003995		0	0	0	0	0	0		0	0	0	0	0	0	0	0	0	-0.0003995
Oats	0	0	-0.021573		0	0	0	0	0	0		0.0137836	0.0011178	0.001598	0.00507357	0	0	0	0	0	0
Millet	0.187	0.8909	-0.0080256		0.324286	0.0789888	0.130144	0.0486429	0.0162143	0.050296		0.047546	0.0350903	0.014784	0.087577	0.124204	0.00130144	0.00390431	0.0016896	0.0162143	0.324286
Sorghum	0.055	1.0608	-0.0135168		0.093203	0.023232	0.036806	0.0139805	0.00466015	0.0145244		0	0.00883344	0.0319715	0.0244325	0.03535	0.00036806	0.00110418	0	0.00466015	0.093203
Cereals, Other	0.244	1.3712	-0.124785		0.39986	0.103212	0.153903	0.0599791	0.019993	0.062773		0.0670095	0.0476279	0.101097	0.132158	0.149335	0.00153903	0.0046171	0.001269	0.019993	0.39986
Starchy Roots	74.869	17.5625	1.95118		29.1413	8.23559	8.23559	4.3712	1.45707	6.84187		3.15975	2.30597	0.99979	10.0762	8.82336	0.0823559	0.247068	0.03861	1.45707	29.1413
Sugar Cane	152.674	68.0499	1.56338		57.6724	19.7866	13.191	8.65086	2.88362	13.1604		6.12533	4.74877	0.345308	16.6499	15.0406	0.13191	10.0035	0.180114	2.88362	57.6724
Sugar Beet	0	0	0		0	0	0	0	0	0		0	0	0	0	0	0	0	0	0	0
Pulses	5.728	1.1739	0.568935		8.33944	2.42294	2.42294	1.25092	0.416972	1.82566		0.880707	0.424015	0.423	2.62785	2.91209	0	0	0.085869	0.416972	8.33944
Treenuts	1.971	1.3394	0.5187		6.5318	1.12347	2.80868	0.97977	0.32659	1.2933		0.475168	0.786429	0	1.81443	2.61049	0	0	0	0.32659	6.5318
Oilcrops	54.385	0.8838	4.75003		89.5496	26.0178	26.0178	13.4324	4.47748	19.6041		7.34458	4.55311	5.18054	27.499	31.2702	0	4.35583	0.106609	4.47748	89.5374
Soyabeans	1.762	1.4179	-1.60101		2.64906	0.797129	0.974269	0.397359	0.132453	0.347851		0.637281	1.4457	0	0.935832	1.06415	0	0	0.0346551	0.132453	2.64906
Vegetables	34.158	9.7823	-0.0667966		4.60783	2.04265	0.510662	0.691175	0.230392	1.13296		1.21659	0.0893659	0.000299	2.0967	1.04129	0	0	0	0.230392	4.60783
Fruits	53.763	12.4913	0.407835		26.7252	4.59674	11.4918	4.00878	1.33626	5.29159		2.52545	0	0.0770355	8.47997	13.8987	0	0	0	1.33626	26.7252
Cotton	0.38116	0.5635	0		0.895581	0.174952	0.408222	0.134337	0.0447791	0.13329		0	0	0	0.21294	0.485653	0.152126	0	8.28635e-05	0.0447791	0.895581
Forage crops	136.72	40.9031	0		35.0904	16.4035	0	14.0362	4.65076	0		0	16.4035	0	0	14.0362			0	4.65076	35.0904
Other	0	0	0		0	0	0	0	0	0		0	0	0	0	0	0	0	0	0	0
TOTAL	549.363		8.09153		631.956	152.866	201.587	103.566	34.4941	139.444		66.8802	65.3836	17.903	193.495	223.27	1.72165	19.0204	1.68473	34.4941	631.944
			SE Asia			Livestock system inputs and outputs
Livestock feed				NPP sinks						Livestock system outcomes			Manure uses			Final outcomes
	total available in DM	total used in DM	Undergrou. NPP ratio	Total NPP	NPP remaining on land	NPP used	Relative digestability			Food	Manure	Respiration	Fuel, material	Soil	Waste	Total meat	Losses of meat	Total soil	Fuel, material	Respiration	Other ecosystem serv.	Manure losses	TOTAL
Source	[8]	[8]	ass.	calcualted			[8]			calculated			ass.	[12]	[12]	calculated
Unit	TgC	TgC		TgC												TgC
Grazing	31.3324	14.8176	0.5	47.4164	40.3039	7.11245	0.289863			0.0259708	0.0691393	0.904895	0	1	0	0.158908	0.0258083	0.49175	0	6.43602	40.3039	0	47.4164
Forrage	see crops table					16.4035	0.368362			0.0330041	0.212921	0.754079	0.01	0.436901	0.543099	0.465741	0.0756412	1.52594	0.0349265	12.3695	0	1.89685	16.3686
Feed						17.903	1			0.0895969	0.156328	0.754079	0.01	0.436901	0.543099	1.37993	0.224116	1.22277	0.0279874	13.5002	0	1.51999	17.875
Residuals						48.9801	0.289863			0.0330041	0.212921	0.754079	0.01	0.436901	0.543099	1.39068	0.225861	4.5564	0.104289	36.9349	0	5.66392	48.876
TOTAL						90.399										3.39526	0.551427	7.79687	0.167203	69.2407	40.3039	9.08077	130.536
Livestock products										Food demand incr. to 2050	Demand under meat reduction scenario
	Livestock production	Livestock production in C	Agricultural wastage	Food wastage	Net trade - exports	Total meat
Source	[11]	calculated	[6]	[6]	[11]					[13]	[14]
Unit	TgC	TgC			TgC	TgC				%	TgC
Pig meat	6.96481	1.30161	0.104	0.11	-0.006363	1.02806				2.09863	2.19017
Beef and Buffalo Meat + (Total)	1.64162	0.30679	0.104	0.11	-0.0529134	0.282727				2.09863	0.612255
Eggs Primary + (Total)	3.88173	0.852094	0.104	0.11	0.0296993	0.646402				2.09863	1.37054
Milk,Total + (Total)	3.733	0.284725	0.115	0.11	-0.359375	0.499177				2.19548	1.17782
Poultry Meat + (Total)	6.19237	1.15725	0.104	0.11	0.0108841	0.901043				2.09863	1.89479
Sheep and Goat Meat + (Total)	0.232229	0.0433997	0.104	0.11	-0.00385129	0.0371393				2.09863	0.0798243
TOTAL	22.6458	3.94586			-0.38192	3.39455					7.3254
References
[1]	Scarlat et al. (2010)
[2]	Haberl et al. (2007)
[3]	Roy et al. (2001)
[4]	Oerke and Dehne (1997)
[5]	Faostat (2013) Food Balance Sheets
[6]	Gustavsson (2012)
[7]	Biofuels platform (2012)
[8]	Wirsenius (2000)
[9]	after Smil (1999)
[10]	Streets et al. 2003
[11]	Faostat (2013) production
[12]	Conant et al. 2013
[13]	Alexandratos & Bruinsma (2012)
[14]	Willet (2001)

[truncated: 5 more sheets: WEurope, WAsia, WMESAfrica, Global, References]
